# Supplementary material
Source: publisher figshare collection journal article supplement (https://gsapubs.figshare.com/ndownloader/files/40838735)
Supplement: Supplementary file 1 [file 40838735]

## Sheet: Sheet1
	Table S2. Apatite trace element analysis results of the eastern Yanshan fold belt, northeastern Asia.
	Mn_ppm_m55	Mn_ppm_m55_Int2SE	Sr_ppm_m88	Sr_ppm_m88_Int2SE	Y_ppm_m89	Y_ppm_m89_Int2SE	Sr/Y	LOG10(Sr/Y)	SUM(LREE)	LOG10(SUM LREE)	La_ppm_m139	La_ppm_m139_Int2SE	Ce_ppm_m140	Ce_ppm_m140_Int2SE	Pr_ppm_m141	Pr_ppm_m141_Int2SE	Nd_ppm_m146	Nd_ppm_m146_Int2SE	Sm___ppm_m147	Sm___ppm_m147_Int2SE	Eu_ppm_m153	Eu_ppm_m153_Int2SE	Gd_ppm_m157	Gd_ppm_m157_Int2SE	Tb_ppm_m159	Tb_ppm_m159_Int2SE	Dy_ppm_m163	Dy_ppm_m163_Int2SE	Ho_ppm_m165	Ho_ppm_m165_Int2SE	Er_ppm_m166	Er_ppm_m166_Int2SE	Tm_ppm_m169	Tm_ppm_m169_Int2SE	Yb_ppm_m172	Yb_ppm_m172_Int2SE	Lu_ppm_m175	Lu_ppm_m175_Int2SE	U_ppm_m238	U_ppm_m238_Int2SE
L12_0	106	17	594	80	60.4	8.4	9.83444	0.99275	2512	3.40002	378	41	1300	160	190	25	644	64	104	14	16.1	3.1	——	——	——	——	——	——	——	——	——	——	——	——	——	——	0.098	0.077	3.21	0.21
L12_1	113	24	960	180	27.5	5.5	34.9091	1.54294	1776	3.24944	264	34	930	130	105	17	477	71	71	13	13.2	2.2	——	——	——	——	——	——	——	——	——	——	——	——	——	——	Below LOD	Below LOD	14.5	1
L12_2	459	88	1390	230	298	41	4.66443	0.668799	2427	3.38507	173	23	1250	220	194	27	810	110	153	25	29.6	5.5	——	——	——	——	——	——	——	——	——	——	——	——	——	——	2.04	0.55	4.84	0.42
L12_3	258	39	497	71	390	46	1.27436	0.105292	3657	3.56312	370	42	1910	270	267	40	1110	160	204	21	22.7	4.1	——	——	——	——	——	——	——	——	——	——	——	——	——	——	3.23	0.68	1.16	0.1
L12_4	106	18	1050	170	16.9	3.7	62.1302	1.7933	1292	3.11126	238	37	650	100	80	13	324	38	45.6	7.3	8	1.7	——	——	——	——	——	——	——	——	——	——	——	——	——	——	0.074	0.072	9.25	0.61
L12_5	96	19	361	64	66	12	5.4697	0.737963	3820	3.58206	492	63	1940	330	288	48	1100	120	199	27	20.9	3.4	——	——	——	——	——	——	——	——	——	——	——	——	——	——	0.082	0.08	0.893	0.066
L12_6	347	48	582	92	420	46	1.38571	0.141674	2640	3.4216	231	24	1250	230	184	22	975	98	215	32	23.7	4.5	——	——	——	——	——	——	——	——	——	——	——	——	——	——	3.12	0.72	2.25	0.15
L12_7	86	18	970	150	23.6	4	41.1017	1.61386	1898	3.2783	394	52	1070	180	93	11	341	41	45.3	8.2	11.8	2.3	——	——	——	——	——	——	——	——	——	——	——	——	——	——	0.017	0.035	15.8	1.1
L12_8	100	17	920	130	23.7	5.2	38.8186	1.58904	907	2.95761	157	27	457	88	56	7.8	237	30	34.7	6.1	8.3	1.6	——	——	——	——	——	——	——	——	——	——	——	——	——	——	0.12	0.085	9.31	0.68
L12_9	94	15	1080	160	24.3	4.3	44.4444	1.64782	1443	3.15927	332	48	706	97	88	10	317	40	39.2	6	8.5	1.5	——	——	——	——	——	——	——	——	——	——	——	——	——	——	Below LOD	Below LOD	12.94	0.88
L12_10	908	92	1060	130	559	77	1.89624	0.277894	4758	3.67742	818	94	2360	290	290	34	1290	130	212	25	34.8	4.6	——	——	——	——	——	——	——	——	——	——	——	——	——	——	4.24	0.75	2.29	0.16
L12_11	122	22	1110	140	49.7	7.4	22.334	1.34897	1514	3.18013	211	21	770	160	99	12	434	42	57.1	8.6	13.9	2.3	——	——	——	——	——	——	——	——	——	——	——	——	——	——	0.32	0.14	12.82	0.81
L12_12	121	19	1030	170	23.8	4.8	43.2773	1.63626	988	2.99476	160	23	493	71	71	10	264	27	44.5	6.8	8.8	1.6	——	——	——	——	——	——	——	——	——	——	——	——	——	——	Below LOD	Below LOD	7.14	0.47
L12_13	870	140	1160	210	486	81	2.38683	0.377822	4401	3.64355	870	120	2220	330	241	34	1070	110	183	20	39.4	7	——	——	——	——	——	——	——	——	——	——	——	——	——	——	3.63	0.68	1.3	0.11
L12_14	88	15	950	120	27.8	4.9	34.1727	1.53368	1814	3.25864	389	54	990	160	95	14	340	40	41.5	7.5	11.6	1.8	——	——	——	——	——	——	——	——	——	——	——	——	——	——	0.016	0.032	20.3	1.1
L12_15	296	40	729	73	910	140	0.801099	-0.0963139	3867	3.58737	319	50	1840	300	228	25	1480	140	326	37	52.3	7.9	——	——	——	——	——	——	——	——	——	——	——	——	——	——	8.5	1.2	10	0.66
L12_16	3270	390	680	100	1050	120	0.647619	-0.18868	14640	4.16554	2680	300	8100	1400	850	110	3010	360	423	43	89	13	——	——	——	——	——	——	——	——	——	——	——	——	——	——	6.54	0.95	3.84	0.27
L12_17	178	24	327	39	121	18	2.70248	0.431762	1711	3.23325	78	10	606	96	145	18	882	65	265	31	30.2	3.6	——	——	——	——	——	——	——	——	——	——	——	——	——	——	0.67	0.21	1.109	0.073
L12_18	116	15	1250	200	33.1	5.3	37.7644	1.57708	1930	3.28556	459	75	1020	140	101	15	350	60	45.6	5.8	13.5	2.1	——	——	——	——	——	——	——	——	——	——	——	——	——	——	0.072	0.071	14.23	0.81
L12_19	103	15	940	110	25.4	4	37.0079	1.56829	1175.5	3.07022	186	23	583	87	73.5	9	333	45	44.4	7.6	9.9	1.7	——	——	——	——	——	——	——	——	——	——	——	——	——	——	0.019	0.037	10.12	0.82
L12_20	95	13	1020	110	17.3	4	58.9595	1.77055	1422	3.1529	259	33	760	120	81	13	322	40	55.2	7.8	10.8	1.6	——	——	——	——	——	——	——	——	——	——	——	——	——	——	Below LOD	Below LOD	10.05	0.6
L14_0	391	53	1330	220	380	52	3.5	0.544068	5213	3.71709	970	110	2650	410	323	48	1270	240	213	28	26.8	3.5	——	——	——	——	——	——	——	——	——	——	——	——	——	——	2.16	0.5	6.9	0.5
L14_1	570	130	1200	250	488	73	2.45902	0.390761	5554	3.74461	1300	200	2700	430	304	39	1250	130	263	40	33.9	4.9	——	——	——	——	——	——	——	——	——	——	——	——	——	——	4.11	0.91	6.24	0.59
L14_2	398	72	1450	330	436	50	3.32569	0.521882	5894	3.77041	1350	230	2680	330	384	83	1480	210	283	40	24.5	5.1	——	——	——	——	——	——	——	——	——	——	——	——	——	——	4.31	0.83	7.8	0.66
L14_3	396	86	1040	200	492	87	2.11382	0.325068	6799	3.83245	1370	230	3500	610	439	92	1490	200	320	50	22.1	5.4	——	——	——	——	——	——	——	——	——	——	——	——	——	——	2.2	0.51	6.6	0.66
L14_4	427	44	1210	150	455	54	2.65934	0.424774	6424	3.80781	1340	150	3430	630	344	39	1310	160	260	28	30.1	3.5	——	——	——	——	——	——	——	——	——	——	——	——	——	——	3.24	0.56	7.38	0.53
L14_5	398	71	1470	360	389	71	3.77892	0.577368	6044	3.78132	1340	230	3160	720	334	67	1210	150	270	58	27.1	5	——	——	——	——	——	——	——	——	——	——	——	——	——	——	2.9	0.8	7.02	0.76
L14_6	386	69	1480	350	447	68	3.31096	0.519954	5688	3.75496	1180	240	2940	570	378	67	1190	170	285	54	28.4	4.5	——	——	——	——	——	——	——	——	——	——	——	——	——	——	3.14	0.85	8.01	0.75
L14_7	402	75	1290	180	475	71	2.71579	0.433896	5693	3.75534	1220	160	2960	450	323	58	1190	150	315	53	32.9	5.6	——	——	——	——	——	——	——	——	——	——	——	——	——	——	3.76	0.65	8.78	0.72
L14_9	406	64	1340	330	571	58	2.34676	0.370469	6013	3.77909	1410	230	2850	400	353	49	1400	230	282	34	32.5	4.6	——	——	——	——	——	——	——	——	——	——	——	——	——	——	3.88	0.58	7.73	0.59
L14_10	378	64	950	190	442	49	2.14932	0.332301	6760	3.82995	1220	200	3590	750	360	73	1590	310	319	56	30	9.5	——	——	——	——	——	——	——	——	——	——	——	——	——	——	3.03	0.64	5.42	0.48
L14_11	485	89	1310	280	411	73	3.18735	0.503429	6191	3.79176	1180	220	3330	610	301	58	1380	240	229	33	26.1	5	——	——	——	——	——	——	——	——	——	——	——	——	——	——	3.35	0.83	6.3	0.61
L14_12	447	83	1060	120	506	61	2.09486	0.321155	5803	3.76365	1250	180	2800	510	393	71	1360	160	235	26	27.6	4.4	——	——	——	——	——	——	——	——	——	——	——	——	——	——	3.47	0.78	7.31	0.52
L14_13	433	66	820	160	434	76	1.8894	0.276324	5294	3.72378	1310	220	2440	450	344	67	1200	190	223	38	23	3.6	——	——	——	——	——	——	——	——	——	——	——	——	——	——	3.91	0.93	6.78	0.56
L14_14	423	96	900	110	515	66	1.74757	0.242435	6134	3.78774	1450	240	3020	750	344	72	1320	150	282	54	32.2	8.1	——	——	——	——	——	——	——	——	——	——	——	——	——	——	3.03	0.73	6.89	0.65
L14_15	570	120	1050	170	402	71	2.61194	0.416963	5049	3.70321	1070	200	2350	480	319	59	1310	210	225	37	26.7	4.7	——	——	——	——	——	——	——	——	——	——	——	——	——	——	2.25	0.59	6.93	0.72
L14_16	456	75	1350	320	479	89	2.81837	0.449998	6182	3.79113	980	160	3340	860	392	78	1470	280	234	48	29.1	5.5	——	——	——	——	——	——	——	——	——	——	——	——	——	——	3.09	0.71	7.41	0.72
L14_17	524	99	1000	190	590	100	1.69492	0.229148	7936	3.8996	1520	250	4210	970	336	51	1870	330	303	41	32.7	6.5	——	——	——	——	——	——	——	——	——	——	——	——	——	——	3.5	0.84	5.27	0.46
L14_18	444	74	1170	200	501	62	2.33533	0.368348	5619	3.74966	1240	160	2580	420	299	49	1500	230	245	29	28.8	4.8	——	——	——	——	——	——	——	——	——	——	——	——	——	——	3.35	0.84	7.19	0.54
L14_19	594	81	1280	220	650	100	1.96923	0.294297	6962	3.84273	1490	160	3280	460	402	68	1790	210	335	42	47	10	——	——	——	——	——	——	——	——	——	——	——	——	——	——	4.67	0.99	7.88	0.56
L14_20	369	41	1300	240	452	75	2.87611	0.458805	5331	3.72681	1120	140	2650	440	311	42	1250	170	280	49	25.4	3.4	——	——	——	——	——	——	——	——	——	——	——	——	——	——	3.13	0.7	5.81	0.39
L14_21	383	62	1580	350	580	110	2.72414	0.435229	5608	3.74881	1260	170	2510	440	358	67	1480	220	266	34	34.8	5.3	——	——	——	——	——	——	——	——	——	——	——	——	——	——	3.64	0.71	8.87	0.62
L14_22	412	61	870	230	545	92	1.59633	0.203123	8254	3.91666	1540	260	4400	1100	424	72	1890	270	285	46	27.1	5	——	——	——	——	——	——	——	——	——	——	——	——	——	——	5.1	1.3	8.24	0.85
L14_23	427	51	1360	180	578	71	2.35294	0.371611	6396	3.80591	1310	160	3130	540	336	39	1620	160	343	44	42.6	6.6	——	——	——	——	——	——	——	——	——	——	——	——	——	——	4.13	0.99	9.03	0.61
L14_24	344	47	1210	230	660	120	1.83333	0.263241	8072	3.90698	1510	190	4450	800	412	73	1700	220	302	37	36.1	5.3	——	——	——	——	——	——	——	——	——	——	——	——	——	——	3.78	0.78	10	0.98
L14_25	353	39	1410	220	465	78	3.03226	0.481766	5712	3.75679	1090	180	2920	500	282	35	1420	250	268	40	33.6	6.8	——	——	——	——	——	——	——	——	——	——	——	——	——	——	2.5	0.52	7.75	0.65
L14_26	441	76	850	150	540	96	1.57407	0.197025	7173	3.8557	1460	210	3880	740	373	65	1460	180	359	60	13.3	2.9	——	——	——	——	——	——	——	——	——	——	——	——	——	——	3.02	0.75	6.09	0.63
L14_27	418	72	1230	180	530	110	2.32075	0.365629	5456	3.73687	1330	190	2520	390	386	68	1220	170	273	39	27.5	4.4	——	——	——	——	——	——	——	——	——	——	——	——	——	——	3.05	0.65	7.6	0.6
L14_28	444	67	1490	360	539	93	2.76438	0.441598	6295	3.799	1430	200	3020	410	375	77	1470	190	312	48	35.1	6.3	——	——	——	——	——	——	——	——	——	——	——	——	——	——	3.24	0.76	8.32	0.69
L14_29	543	89	1060	150	531	55	1.99623	0.300211	6524	3.81451	1610	230	3010	490	384	59	1520	210	263	41	28.2	5.4	——	——	——	——	——	——	——	——	——	——	——	——	——	——	3.16	0.7	9.12	0.69
L14_30	392	43	1170	220	594	96	1.9697	0.294399	6153	3.78909	1670	250	2820	540	343	41	1320	160	262	42	25.6	3.7	——	——	——	——	——	——	——	——	——	——	——	——	——	——	3.48	0.77	6.88	0.51
L14_31	412	62	1190	240	518	75	2.2973	0.361217	6325	3.80106	1580	290	2930	530	365	56	1450	230	291	53	34	5.9	——	——	——	——	——	——	——	——	——	——	——	——	——	——	3.24	0.75	8.57	0.78
L14_32	510	100	1300	210	438	90	2.96804	0.472469	5713	3.75686	1350	180	2860	470	293	59	1210	200	177	33	23.1	4.6	——	——	——	——	——	——	——	——	——	——	——	——	——	——	2.46	0.67	5.05	0.47
L14_33	468	64	1010	150	480	61	2.10417	0.32308	7016	3.84609	1570	190	3500	580	376	67	1570	250	218	27	28.6	5.1	——	——	——	——	——	——	——	——	——	——	——	——	——	——	3.22	0.74	5.07	0.41
L14_34	487	92	1000	150	454	64	2.20264	0.342944	8350	3.92169	1740	240	4500	1100	480	100	1630	270	305	50	21	3.9	——	——	——	——	——	——	——	——	——	——	——	——	——	——	3.7	0.87	7.95	0.72
L14_35	372	48	1110	160	511	73	2.17221	0.336902	6184	3.79127	1400	180	2930	600	334	49	1520	260	266	36	33.3	5.9	——	——	——	——	——	——	——	——	——	——	——	——	——	——	2.34	0.69	6.79	0.62
L14_36	403	62	1120	160	490	77	2.28571	0.359022	7180	3.85612	1330	170	4000	1200	420	100	1430	160	290	48	31.1	4.2	——	——	——	——	——	——	——	——	——	——	——	——	——	——	2.63	0.79	8.53	0.68
L14_37	417	88	1190	190	340	45	3.5	0.544068	4984	3.69758	840	120	2560	590	294	53	1290	200	192	28	25.6	4.1	——	——	——	——	——	——	——	——	——	——	——	——	——	——	2.11	0.61	6.45	0.67
L14_38	455	91	940	130	579	65	1.62349	0.210449	7226	3.8589	1370	190	3510	850	366	46	1980	320	334	44	29	4.9	——	——	——	——	——	——	——	——	——	——	——	——	——	——	3.83	0.66	8.54	0.61
L14_39	418	63	1190	160	365	42	3.26027	0.513254	5052	3.70346	750	99	2340	360	332	52	1630	210	241	36	26.2	4.3	——	——	——	——	——	——	——	——	——	——	——	——	——	——	2.27	0.56	2.69	0.25
L14_40	361	53	1200	200	541	62	2.21811	0.345984	6228	3.79435	1110	130	2960	520	398	73	1760	310	278	43	34.6	6.9	——	——	——	——	——	——	——	——	——	——	——	——	——	——	2.99	0.69	8.58	0.81
L14_41	360	42	1380	220	442	56	3.12217	0.494457	5133	3.71037	858	91	2550	470	265	37	1460	190	231	40	32	4.9	——	——	——	——	——	——	——	——	——	——	——	——	——	——	2.45	0.58	6.58	0.5
L14_42	417	69	920	140	480	45	1.91667	0.282547	6385	3.80516	1130	200	3260	510	315	37	1680	220	247	32	23.7	3.9	——	——	——	——	——	——	——	——	——	——	——	——	——	——	2.91	0.62	6.6	0.51
L14_43	393	58	1420	250	537	61	2.64432	0.422314	6095	3.78497	1160	170	2770	400	355	42	1810	270	249	27	36.3	4.6	——	——	——	——	——	——	——	——	——	——	——	——	——	——	3.04	0.75	9.14	0.54
L14_44	489	67	1120	130	575	57	1.94783	0.28955	6954	3.84223	1340	170	3480	700	384	48	1750	210	294	39	30.1	5.3	——	——	——	——	——	——	——	——	——	——	——	——	——	——	3.7	1	8.36	0.53
L14_45	428	68	980	190	507	65	1.93294	0.286218	6070	3.78319	1060	130	2770	440	370	60	1870	360	278	48	21.3	4.3	——	——	——	——	——	——	——	——	——	——	——	——	——	——	3.6	0.81	7.59	0.72
L14_46	464	83	1490	260	401	67	3.71571	0.570042	4923	3.69223	920	100	2310	400	323	52	1370	230	217	28	32.6	5.9	——	——	——	——	——	——	——	——	——	——	——	——	——	——	2.62	0.54	6.9	0.58
L23_0	860	150	610	120	417	55	1.46283	0.165194	6101	3.7854	1400	150	3060	260	311	35	1330	190	191	26	19.4	3.3	——	——	——	——	——	——	——	——	——	——	——	——	——	——	3.43	0.75	5.04	0.3
L23_1	738	81	563	74	419	71	1.34368	0.128294	7063	3.84899	1510	190	3880	530	343	48	1330	190	218	40	21.2	3.9	——	——	——	——	——	——	——	——	——	——	——	——	——	——	3.1	0.71	4.35	0.32
L23_2	870	110	639	71	414	51	1.54348	0.188501	6699	3.82601	1540	170	3370	400	339	41	1450	160	242	41	21.4	2.5	——	——	——	——	——	——	——	——	——	——	——	——	——	——	3.7	0.98	3.83	0.26
L23_3	860	110	500	56	370	45	1.35135	0.130768	5962	3.77539	1280	210	3010	410	322	42	1350	160	191	28	24.7	3.8	——	——	——	——	——	——	——	——	——	——	——	——	——	——	2.48	0.54	5.14	0.27
L23_4	766	85	700	110	363	49	1.92837	0.285191	6429	3.80814	1330	170	3730	670	299	36	1070	110	174	29	21.2	3.6	——	——	——	——	——	——	——	——	——	——	——	——	——	——	2.21	0.66	2.29	0.15
L23_5	713	98	345	48	243	36	1.41975	0.152213	2047	3.31112	544	64	1050	160	96	11	357	37	54	11	21.4	4.4	——	——	——	——	——	——	——	——	——	——	——	——	——	——	3.25	0.82	29.3	1.9
L23_6	820	120	680	130	441	64	1.54195	0.18807	7517	3.87604	1480	180	4010	740	387	53	1640	190	204	24	25	4.3	——	——	——	——	——	——	——	——	——	——	——	——	——	——	3.3	0.89	10.79	0.73
L23_7	776	89	580	130	424	59	1.36792	0.136062	7172	3.85564	1620	180	3860	610	352	47	1340	180	171	27	18.8	3.4	——	——	——	——	——	——	——	——	——	——	——	——	——	——	3.7	1	4.13	0.23
L23_8	750	110	510	71	398	46	1.28141	0.107687	4699	3.67201	1023	89	2470	360	236	35	970	110	168	26	14.5	2.2	——	——	——	——	——	——	——	——	——	——	——	——	——	——	3.85	0.98	5.08	0.4
L23_9	791	90	644	86	680	100	0.947059	-0.023623	10901	4.03747	2100	310	6300	1200	501	64	2000	250	271	43	31.6	3.9	——	——	——	——	——	——	——	——	——	——	——	——	——	——	4.8	1.2	4.3	0.34
L23_10	728	84	672	95	451	62	1.49002	0.173193	7665	3.88451	1430	150	4190	560	385	49	1660	230	225	36	25.2	4.3	——	——	——	——	——	——	——	——	——	——	——	——	——	——	3.28	0.86	2.35	0.15
L23_11	620	83	890	100	598	86	1.48829	0.172689	3091	3.4901	598	64	1500	240	153	21	840	100	162	21	15.7	2.4	——	——	——	——	——	——	——	——	——	——	——	——	——	——	6.1	1.2	14.77	0.97
L23_12	760	100	670	110	401	55	1.67082	0.22293	7993	3.90271	1510	230	4400	1100	353	38	1730	240	214	25	29.3	5.7	——	——	——	——	——	——	——	——	——	——	——	——	——	——	3.24	0.74	2.95	0.24
L23_13	698	89	543	78	406	69	1.33744	0.126274	6168	3.79014	1340	170	3320	500	298	40	1210	150	187	31	23.4	5.1	——	——	——	——	——	——	——	——	——	——	——	——	——	——	3.3	1.1	6.75	0.53
L23_14	640	110	850	160	900	120	0.944444	-0.0248236	3061	3.48586	590	65	1490	320	171	26	810	100	181	25	26	4.8	——	——	——	——	——	——	——	——	——	——	——	——	——	——	8.5	1.5	18.9	1.2
L23_15	930	130	970	320	510	52	1.90196	0.279202	8021	3.90423	1700	190	4310	830	401	48	1610	200	251	40	27.7	4	——	——	——	——	——	——	——	——	——	——	——	——	——	——	3.19	0.89	4.61	0.42
L23_16	783	96	461	92	2370	280	0.194515	-0.711047	2302	3.36211	210	28	980	150	162	19	950	130	364	54	20.2	4.4	——	——	——	——	——	——	——	——	——	——	——	——	——	——	16.8	2.7	38.4	2.3
L23_17	805	94	790	120	650	110	1.21538	0.0847137	5220	3.71767	1170	160	2510	360	280	46	1260	190	221	34	27.1	4.3	——	——	——	——	——	——	——	——	——	——	——	——	——	——	4.6	0.72	22.9	1.9
L23_18	840	120	465	69	376	46	1.2367	0.0922651	6304	3.79962	1250	150	3490	540	394	62	1170	160	216	33	24.8	4.9	——	——	——	——	——	——	——	——	——	——	——	——	——	——	2.7	0.64	4.06	0.39
L23_19	840	110	583	72	609	83	0.957307	-0.0189487	6883	3.83778	1620	200	3440	430	423	65	1400	140	268	39	25.3	5.2	——	——	——	——	——	——	——	——	——	——	——	——	——	——	4.78	0.9	4.12	0.33
L23_20	870	110	621	80	466	68	1.33262	0.124706	6776	3.83097	1640	220	3230	450	436	59	1470	160	251	32	25	3.8	——	——	——	——	——	——	——	——	——	——	——	——	——	——	3.6	0.95	4.47	0.32
L23_21	800	120	650	120	355	44	1.83099	0.262685	5519	3.74186	1280	150	2780	390	359	50	1100	130	197	27	24.1	5.2	——	——	——	——	——	——	——	——	——	——	——	——	——	——	1.99	0.57	4.11	0.34
L23_22	890	100	230	36	1180	180	0.194915	-0.710154	1916	3.2824	277	39	860	160	128	14	651	65	190	36	20.8	3.7	——	——	——	——	——	——	——	——	——	——	——	——	——	——	14	2.5	17	1.1
L23_23	740	110	950	190	425	60	2.23529	0.349335	7351	3.86635	1470	200	3770	530	471	61	1640	220	202	28	30.6	5.4	——	——	——	——	——	——	——	——	——	——	——	——	——	——	2.3	0.66	16.2	1.3
L23_24	790	120	675	84	352	50	1.91761	0.282761	5347	3.72811	1320	170	2640	340	297	35	1090	140	138	17	20.8	3	——	——	——	——	——	——	——	——	——	——	——	——	——	——	2.9	0.77	3.93	0.28
L23_25	700	130	700	110	368	56	1.90217	0.27925	6135	3.78781	1240	180	3310	550	285	36	1300	160	186	29	18.2	3.3	——	——	——	——	——	——	——	——	——	——	——	——	——	——	3.14	0.72	3.38	0.28
L23_26	770	110	580	81	424	65	1.36792	0.136062	5023	3.70096	1020	100	2630	310	273	34	1100	160	156	30	15.2	2.6	——	——	——	——	——	——	——	——	——	——	——	——	——	——	2.54	0.86	4.78	0.31
L23_27	910	180	655	92	498	95	1.31526	0.119012	6377	3.80462	1320	180	3280	580	327	41	1450	210	207	22	23.1	4	——	——	——	——	——	——	——	——	——	——	——	——	——	——	3.24	0.82	4.02	0.3
L23_28	730	110	593	90	387	53	1.5323	0.185344	6140	3.78817	1230	160	3310	580	320	41	1280	120	215	35	22.9	2.8	——	——	——	——	——	——	——	——	——	——	——	——	——	——	2.51	0.73	3.72	0.24
L23_29	621	85	780	110	527	64	1.48008	0.170284	8602	3.9346	1730	230	4410	700	482	91	1980	270	291	41	30.3	4.7	——	——	——	——	——	——	——	——	——	——	——	——	——	——	3.17	0.76	9.28	0.66
L23_1_0	659	76	686	82	428	50	1.6028	0.20488	7965	3.90119	1820	200	4140	590	435	53	1570	160	281	38	29.6	4.9	——	——	——	——	——	——	——	——	——	——	——	——	——	——	2.76	0.7	3.45	0.23
L23_1_1	808	83	666	68	606	61	1.09901	0.0410016	7265	3.86124	1560	140	3520	260	405	25	1780	110	307	36	30.5	4.8	——	——	——	——	——	——	——	——	——	——	——	——	——	——	3.6	1	3.97	0.2
L23_1_2	769	86	665	67	693	54	0.959596	-0.0179116	9040	3.95617	1900	160	4460	380	490	37	2190	190	345	34	38.3	5.6	——	——	——	——	——	——	——	——	——	——	——	——	——	——	4.6	1.2	4.78	0.28
L23_1_3	741	88	324	38	303	30	1.06931	0.0291024	4168	3.61993	855	64	2040	170	233	22	1040	110	174	26	20	4	——	——	——	——	——	——	——	——	——	——	——	——	——	——	3.6	1.1	1.195	0.096
L23_1_4	736	58	593	61	458	41	1.29476	0.112189	6474	3.81117	1350	100	3280	340	374	32	1470	150	269	32	28.2	5.3	——	——	——	——	——	——	——	——	——	——	——	——	——	——	3.6	1.1	2.21	0.14
L23_1_5	860	140	737	99	447	67	1.64877	0.21716	5771	3.76125	1240	180	2740	330	351	39	1440	180	256	40	31.8	5.5	——	——	——	——	——	——	——	——	——	——	——	——	——	——	2.75	0.77	14.2	1
L23_1_6	773	80	536	52	329	34	1.62918	0.211969	4935	3.69329	1019	87	2490	270	276	30	1150	110	198	27	17.9	3.7	——	——	——	——	——	——	——	——	——	——	——	——	——	——	2.21	0.64	0.882	0.088
L23_1_7	796	86	730	120	668	68	1.09281	0.0385464	8798	3.94438	1860	190	4470	460	498	48	1970	180	310	36	32.8	5.1	——	——	——	——	——	——	——	——	——	——	——	——	——	——	4.7	1.3	3.77	0.21
L23_1_8	697	61	576	52	697	79	0.826399	-0.0828103	6726	3.82776	1380	140	3450	480	396	43	1500	190	242	28	23.5	4.4	——	——	——	——	——	——	——	——	——	——	——	——	——	——	6	1.3	9.3	0.7
L23_1_9	825	83	635	66	437	63	1.45309	0.162292	6491	3.81231	1530	180	3200	400	321	27	1440	150	196	28	26.3	4.8	——	——	——	——	——	——	——	——	——	——	——	——	——	——	2.29	0.76	3.77	0.2
L23_1_10	737	83	798	82	314	33	2.5414	0.405073	4792	3.68052	1030	100	2330	320	282	30	1150	120	179	16	19.7	3.2	——	——	——	——	——	——	——	——	——	——	——	——	——	——	2.02	0.73	21.1	1.1
L23_1_11	689	82	624	78	545	58	1.14495	0.0587881	6995	3.84479	1200	110	3510	490	435	42	1850	170	366	40	22.5	3.3	——	——	——	——	——	——	——	——	——	——	——	——	——	——	3.31	0.96	33.5	1.9
L23_1_12	790	110	690	120	294	46	2.34694	0.370502	4094	3.61215	840	140	2150	240	226	28	878	99	162	31	23.4	4.9	——	——	——	——	——	——	——	——	——	——	——	——	——	——	2.86	0.75	32.2	2.7
L23_1_13	940	170	627	68	555	83	1.12973	0.0529746	8531	3.931	1710	190	4470	450	461	62	1890	200	357	43	43.7	7.6	——	——	——	——	——	——	——	——	——	——	——	——	——	——	4.05	0.96	33.2	2.7
L23_1_14	680	110	730	180	319	68	2.2884	0.359532	6376	3.80455	1170	180	3570	700	386	79	1250	200	222	41	19.6	4.6	——	——	——	——	——	——	——	——	——	——	——	——	——	——	2.18	0.8	6	0.59
L23_1_15	1000	180	586	90	364	50	1.60989	0.206796	6043	3.78125	1100	130	3400	590	303	41	1240	220	169	31	25.4	5.5	——	——	——	——	——	——	——	——	——	——	——	——	——	——	2.69	0.78	4.13	0.33
L23_1_16	830	150	660	100	342	66	1.92982	0.285518	5774	3.76148	1230	190	3040	490	304	48	1200	170	217	37	20.9	3.7	——	——	——	——	——	——	——	——	——	——	——	——	——	——	2.45	0.85	4.08	0.45
L23_1_17	616	88	1050	160	335	47	3.13433	0.496144	3243	3.51095	691	93	1590	220	176	25	786	83	125	23	18.3	3.4	——	——	——	——	——	——	——	——	——	——	——	——	——	——	2.17	0.66	7.47	0.62
L23_1_18	920	120	680	120	433	52	1.57044	0.196021	7784	3.8912	1620	200	4040	630	474	69	1650	170	274	34	30.5	5.6	——	——	——	——	——	——	——	——	——	——	——	——	——	——	3.06	0.88	4.44	0.28
L23_1_19	831	84	940	140	388	49	2.42268	0.384296	5551	3.74437	1220	140	2640	300	321	40	1370	150	221	37	24.3	4.3	——	——	——	——	——	——	——	——	——	——	——	——	——	——	2.83	0.82	3.61	0.24
L23_1_20	903	96	706	95	369	33	1.91328	0.281778	6300	3.79934	1370	150	3110	340	320	32	1500	160	248	31	25.3	3.6	——	——	——	——	——	——	——	——	——	——	——	——	——	——	1.75	0.74	4.67	0.31
L23_1_21	937	91	618	74	465	59	1.32903	0.123536	6310	3.80003	1430	150	3180	280	350	41	1350	120	178	25	22.7	4.2	——	——	——	——	——	——	——	——	——	——	——	——	——	——	3.5	0.84	3.65	0.25
L23_1_22	734	71	613	68	378	30	1.62169	0.209969	6060	3.78247	1350	140	3170	370	320	26	1220	100	194	27	24.7	4.2	——	——	——	——	——	——	——	——	——	——	——	——	——	——	4	1.1	3.93	0.22
L23_1_23	900	110	598	66	780	77	0.766667	-0.115393	10406	4.01728	2120	160	5240	580	546	46	2500	220	411	49	46.7	6	——	——	——	——	——	——	——	——	——	——	——	——	——	——	5.8	1.3	4.34	0.34
L23_1_24	890	88	510	46	445	35	1.14607	0.0592102	6469	3.81084	1500	120	3150	260	359	37	1460	130	215	30	28	4.3	——	——	——	——	——	——	——	——	——	——	——	——	——	——	4.4	1	4.09	0.22
L23_1_25	884	86	651	64	361	35	1.80332	0.256074	5855	3.76753	1220	110	2840	240	305	22	1490	120	226	26	21.7	4.1	——	——	——	——	——	——	——	——	——	——	——	——	——	——	1.88	0.74	2.48	0.15
L23_1_26	933	89	671	69	621	62	1.08052	0.0336309	8718	3.94042	1830	200	4500	390	468	42	1920	200	300	35	30.8	4.5	——	——	——	——	——	——	——	——	——	——	——	——	——	——	5.1	1.2	4.36	0.32
L23_1_27	950	110	644	62	452	56	1.42478	0.153747	6053	3.78197	1260	110	2940	260	343	35	1510	140	239	40	20	3.5	——	——	——	——	——	——	——	——	——	——	——	——	——	——	4.1	1.1	4.26	0.24
L23_1_28	851	86	456	52	457	48	0.997812	-0.000951357	5469	3.73791	1230	100	2800	270	300	25	1139	95	191	30	20.7	3.4	——	——	——	——	——	——	——	——	——	——	——	——	——	——	3.78	0.85	4.3	0.27
L23_1_29	880	110	640	92	399	41	1.60401	0.205207	5778	3.76178	1340	100	2880	220	318	28	1240	110	192	27	23.6	4.6	——	——	——	——	——	——	——	——	——	——	——	——	——	——	3.13	0.83	3.34	0.2
L23_1_30	862	64	641	71	471	61	1.36093	0.133837	6223	3.794	1400	130	2960	190	343	29	1520	120	190	25	21.6	3.9	——	——	——	——	——	——	——	——	——	——	——	——	——	——	4.1	1.1	2.77	0.16
L23_1_31	1370	110	482	50	577	79	0.835355	-0.0781288	6216	3.79351	1230	110	3070	350	306	26	1610	160	284	37	26.9	5.3	——	——	——	——	——	——	——	——	——	——	——	——	——	——	4.1	1	22.1	1.6
L23_1_32	814	82	590	62	392	43	1.5051	0.177566	6056	3.78219	1270	120	2950	280	346	35	1490	120	248	30	22.8	4.2	——	——	——	——	——	——	——	——	——	——	——	——	——	——	3	1.1	2.77	0.18
L23_1_33	861	88	623	75	273	38	2.28205	0.358325	4631	3.66567	950	120	2350	290	301	44	1030	120	204	29	14.8	3.2	——	——	——	——	——	——	——	——	——	——	——	——	——	——	2.01	0.67	1.98	0.16
L23_1_34	824	96	561	62	457	50	1.22757	0.0890467	6687	3.82523	1490	140	3280	350	387	47	1530	180	223	26	25.4	3.4	——	——	——	——	——	——	——	——	——	——	——	——	——	——	2.98	0.81	3.58	0.21
L23_1_35	774	95	507	51	364	41	1.39286	0.143907	5254	3.72049	1220	110	2680	280	300	24	1054	99	158	19	20.5	4	——	——	——	——	——	——	——	——	——	——	——	——	——	——	2.55	0.91	3.62	0.24
L23_1_36	850	110	770	88	510	52	1.5098	0.178921	7040	3.84757	1430	130	3410	310	410	39	1790	200	305	37	29.1	5	——	——	——	——	——	——	——	——	——	——	——	——	——	——	3.21	0.99	6.01	0.33
L23_1_37	838	89	672	78	379	39	1.77309	0.24873	6074	3.78347	1278	86	3100	260	356	36	1340	130	183	26	18.8	3.5	——	——	——	——	——	——	——	——	——	——	——	——	——	——	3.1	1	4.4	0.31
L23_1_38	810	100	663	60	406	44	1.633	0.212987	6736	3.8284	1420	150	3380	350	396	38	1540	180	260	27	23.7	4	——	——	——	——	——	——	——	——	——	——	——	——	——	——	2.77	0.81	3.88	0.22
L23_1_39	716	84	630	62	367	36	1.71662	0.234674	5597	3.74796	1262	99	2740	270	315	22	1280	130	231	34	23.6	3.8	——	——	——	——	——	——	——	——	——	——	——	——	——	——	2.21	0.69	8.62	0.51
L23_1_40	782	77	472	46	369	32	1.27913	0.106916	5436	3.73528	1280	150	2720	210	306	27	1130	100	168	20	16.1	2.7	——	——	——	——	——	——	——	——	——	——	——	——	——	——	3.62	0.89	4.16	0.21
L23_1_41	793	83	810	110	367	48	2.20708	0.343819	5788	3.76253	1350	160	2790	310	378	56	1270	160	188	18	22.8	4.1	——	——	——	——	——	——	——	——	——	——	——	——	——	——	2.1	0.7	4.04	0.32
L23_1_42	790	150	494	84	301	56	1.6412	0.21516	6034	3.78061	1090	180	3500	1500	334	68	1110	160	173	30	22.6	5.3	——	——	——	——	——	——	——	——	——	——	——	——	——	——	3.08	0.95	3.52	0.46
L23_1_43	790	110	629	61	300	38	2.09667	0.321529	6423	3.80774	1440	170	3310	370	403	53	1270	130	151	21	21.6	3.3	——	——	——	——	——	——	——	——	——	——	——	——	——	——	2.02	0.72	4.48	0.31
L23_1_44	825	85	598	76	479	53	1.24843	0.0963657	7773	3.89059	1840	160	3830	340	513	67	1590	160	270	38	33	5.6	——	——	——	——	——	——	——	——	——	——	——	——	——	——	3.4	0.81	4.47	0.28
L23_1_45	782	75	579	78	368	33	1.57337	0.196831	5832	3.76582	1310	120	2850	220	372	30	1300	120	237	26	21.2	3.8	——	——	——	——	——	——	——	——	——	——	——	——	——	——	2.07	0.73	12.58	0.62
L23_1_46	712	68	631	76	598	69	1.05518	0.0233282	6726	3.82776	1640	130	3300	290	416	32	1370	140	240	22	28.1	3.1	——	——	——	——	——	——	——	——	——	——	——	——	——	——	5.6	1.2	47.3	2.1
L23_1_47	880	110	650	55	337	34	1.92878	0.285283	5777	3.7617	1290	120	2890	280	357	34	1240	120	175	20	19	3.4	——	——	——	——	——	——	——	——	——	——	——	——	——	——	3.23	0.89	1.56	0.12
L23_1_48	705	82	468	38	282	27	1.65957	0.219997	3186	3.50325	775	62	1560	140	196	18	655	61	129	19	11.3	2.3	——	——	——	——	——	——	——	——	——	——	——	——	——	——	1.87	0.65	4.99	0.28
L23_1_49	789	85	509	55	362	40	1.40608	0.148009	5580	3.74663	1255	96	2880	230	355	36	1090	110	159	25	19	3.6	——	——	——	——	——	——	——	——	——	——	——	——	——	——	4.7	1.2	3.34	0.22
L23_1_50	769	84	690	79	368	42	1.875	0.273001	6300	3.79934	1390	120	3120	280	430	39	1360	130	241	25	25.7	3.5	——	——	——	——	——	——	——	——	——	——	——	——	——	——	1.54	0.61	2.34	0.15
L23_1_51	770	100	500	40	149	16	3.3557	0.525784	3951	3.59671	1139	96	2010	180	215	33	587	55	108	16	17.2	2.7	——	——	——	——	——	——	——	——	——	——	——	——	——	——	2.09	0.61	3.05	0.17
L23_1_52	745	64	750	70	385	45	1.94805	0.289601	5753	3.75989	1205	91	2960	340	328	29	1260	110	193	26	26.4	4.9	——	——	——	——	——	——	——	——	——	——	——	——	——	——	2.05	0.7	13.13	0.63
L23_1_53	710	74	585	65	267	32	2.19101	0.340645	5509	3.74107	1355	92	2800	270	329	28	1025	94	169	24	21.6	3.8	——	——	——	——	——	——	——	——	——	——	——	——	——	——	2.12	0.82	8.48	0.42
L23_1_54	727	65	603	61	332	40	1.81627	0.259179	5239	3.71925	1190	110	2580	180	335	34	1134	75	169	20	15	3	——	——	——	——	——	——	——	——	——	——	——	——	——	——	2.69	0.87	0.767	0.063
L23_1_55	710	85	503	52	349	36	1.44126	0.158743	5138	3.71079	1193	86	2440	170	325	28	1180	120	162	27	19.7	3.7	——	——	——	——	——	——	——	——	——	——	——	——	——	——	2.72	0.87	3.26	0.19
L23_1_56	713	78	593	64	413	42	1.43584	0.157105	6255	3.79623	1340	130	3070	320	375	31	1470	140	204	27	26.3	5.1	——	——	——	——	——	——	——	——	——	——	——	——	——	——	2.64	0.78	12.79	0.66
L23_1_57	497	64	586	42	332	35	1.76506	0.24676	5782	3.76208	1610	120	2860	200	272	18	1040	100	105	16	42.6	4.9	——	——	——	——	——	——	——	——	——	——	——	——	——	——	4.58	0.98	29.6	1.5
L23_1_58	722	76	626	65	476	44	1.31513	0.118967	6265	3.79692	1420	120	3110	250	357	26	1378	97	180	21	19.4	3.4	——	——	——	——	——	——	——	——	——	——	——	——	——	——	3.35	0.85	4.25	0.23
L23_1_59	709	62	569	55	322	31	1.76708	0.247256	4878	3.68824	1150	110	2330	170	282	23	1116	81	172	19	22	3.5	——	——	——	——	——	——	——	——	——	——	——	——	——	——	2.38	0.73	2.73	0.17
L23_1_60	718	67	473	50	390	41	1.21282	0.0837965	4943	3.69399	1084	83	2470	210	289	31	1100	110	166	20	14.1	2.2	——	——	——	——	——	——	——	——	——	——	——	——	——	——	2.84	0.85	2.58	0.18
L23_1_61	650	67	601	60	532	56	1.1297	0.0529628	6906	3.83923	1350	79	3610	340	396	34	1550	130	245	26	23.7	3.7	——	——	——	——	——	——	——	——	——	——	——	——	——	——	3.57	0.87	4.19	0.22
L23_1_62	749	92	664	68	468	53	1.4188	0.151922	7032	3.84708	1470	160	3460	470	402	45	1700	180	256	31	25.9	3.5	——	——	——	——	——	——	——	——	——	——	——	——	——	——	3.5	0.98	2.1	0.11
L23_1_63	744	82	378	38	1850	150	0.204324	-0.68968	10753	4.03153	1740	160	5220	590	673	67	3120	310	510	43	76	11	——	——	——	——	——	——	——	——	——	——	——	——	——	——	16	2.5	25.1	1.5
L23_1_64	644	58	632	86	514	46	1.22957	0.089754	5098	3.7074	1210	110	2380	220	248	21	1260	140	196	25	25.7	4.7	——	——	——	——	——	——	——	——	——	——	——	——	——	——	3.72	0.97	8.06	0.43
L23_1_65	638	57	708	73	465	47	1.52258	0.18258	6015	3.77924	1340	140	2770	250	335	24	1570	160	238	24	23	4.1	——	——	——	——	——	——	——	——	——	——	——	——	——	——	2.68	0.59	13.26	0.62
L23_1_66	677	77	675	68	423	35	1.59574	0.202963	6071	3.78326	1360	140	2910	230	331	26	1470	140	189	25	24.6	4.1	——	——	——	——	——	——	——	——	——	——	——	——	——	——	3.13	0.9	4.42	0.25
L23_1_67	664	64	680	72	581	67	1.1704	0.0683328	8925	3.95061	1830	210	4400	550	485	46	2210	210	290	26	37.7	6.3	——	——	——	——	——	——	——	——	——	——	——	——	——	——	3.96	0.89	6.47	0.35
L23_1_68	623	73	638	63	471	49	1.35456	0.1318	6152	3.78902	1430	140	2870	280	332	29	1520	130	215	28	25.4	4.4	——	——	——	——	——	——	——	——	——	——	——	——	——	——	2.91	0.65	3.94	0.22
L23_1_69	693	72	853	83	395	48	2.15949	0.334352	6277	3.79775	1370	140	3050	300	327	22	1530	140	221	30	30.7	4	——	——	——	——	——	——	——	——	——	——	——	——	——	——	3.32	0.86	12.58	0.58
L23_1_70	607	82	554	67	357	43	1.55182	0.190842	6417	3.80733	1320	190	3280	440	347	46	1470	170	180	28	25.6	5.3	——	——	——	——	——	——	——	——	——	——	——	——	——	——	2.59	0.6	4.1	0.33
L23_1_71	670	110	670	120	430	63	1.55814	0.192606	6367	3.80393	1260	150	3190	440	357	45	1560	220	195	19	22.9	3.9	——	——	——	——	——	——	——	——	——	——	——	——	——	——	2.96	0.91	3.86	0.32
L23_1_72	683	70	682	58	539	49	1.26531	0.102196	8215	3.91461	1700	130	4240	350	435	33	1840	120	281	38	33.9	4.9	——	——	——	——	——	——	——	——	——	——	——	——	——	——	3.54	0.85	5.86	0.44
L23_1_73	607	48	626	49	405	36	1.54568	0.189119	6773	3.83078	1380	99	3400	310	343	26	1650	140	230	26	30.4	4.8	——	——	——	——	——	——	——	——	——	——	——	——	——	——	2.53	0.65	9.32	0.42
L23_1_74	640	74	533	64	360	32	1.48056	0.170425	4897	3.68993	1103	89	2460	220	264	23	1070	110	141	19	17.9	3.5	——	——	——	——	——	——	——	——	——	——	——	——	——	——	3.08	0.93	3.68	0.2
L23_1_75	433	52	890	130	276	45	3.22464	0.508481	3909	3.59207	722	90	2130	280	197	30	860	100	141	21	22.6	5.5	——	——	——	——	——	——	——	——	——	——	——	——	——	——	1.57	0.55	6.7	0.64
L26_0	247	39	256	52	1370	250	0.186861	-0.728481	1512	3.17955	70	12	530	110	152	30	760	130	275	49	24.2	5	——	——	——	——	——	——	——	——	——	——	——	——	——	——	7.4	1.6	25	2.8
L26_1	480	100	960	250	168	27	5.71429	0.756962	968	2.98588	118	24	470	110	65	15	315	56	50	11	8.8	2.3	——	——	——	——	——	——	——	——	——	——	——	——	——	——	1.89	0.5	11.9	1.2
L26_2	386	84	405	87	195	26	2.07692	0.31742	3424	3.53453	560	100	1730	370	244	42	890	170	100	17	19.2	4.6	——	——	——	——	——	——	——	——	——	——	——	——	——	——	3	0.7	11.7	1.2
L26_3	410	110	620	110	296	43	2.09459	0.3211	2687	3.42927	244	57	1070	200	213	41	1160	180	190	25	13.4	2.5	——	——	——	——	——	——	——	——	——	——	——	——	——	——	0.97	0.39	2.5	0.24
L26_4	386	59	610	140	346	51	1.76301	0.246254	2733	3.43664	447	90	1200	280	176	33	910	160	169	32	22	4.3	——	——	——	——	——	——	——	——	——	——	——	——	——	——	4.4	1.4	16.8	1.6
L26_5	295	51	2830	520	89	17	31.7978	1.5024	290.8	2.46359	19	3.3	113	33	21.8	6.7	137	30	28.8	7.5	7	1.8	——	——	——	——	——	——	——	——	——	——	——	——	——	——	1.35	0.4	10.6	1.2
L26_6	250	41	306	59	362	57	0.845304	-0.0729871	1289	3.11025	88	13	462	77	109	17	630	130	150	31	28.5	5.3	——	——	——	——	——	——	——	——	——	——	——	——	——	——	3.9	0.93	12.24	0.91
L26_7	756	93	287	49	519	61	0.552987	-0.257285	1649	3.21722	136	29	750	200	126	23	637	93	167	22	18.3	3.3	——	——	——	——	——	——	——	——	——	——	——	——	——	——	3.05	0.96	16.1	1.3
L26_8	240	47	393	80	2820	440	0.139362	-0.855857	15280	4.18412	2820	390	6900	1100	1110	240	4450	770	630	77	23.8	4.2	——	——	——	——	——	——	——	——	——	——	——	——	——	——	47.6	7.8	118.4	9.6
L26_9	650	140	560	150	360	64	1.55556	0.191886	3981	3.59999	660	130	2400	1000	161	33	760	210	116	19	30.8	7.4	——	——	——	——	——	——	——	——	——	——	——	——	——	——	4.8	1.2	14.1	2
L26_10	312	82	1290	370	105	17	12.2857	1.0894	945	2.97543	70	14	368	99	77	18	430	110	75	16	22	5.3	——	——	——	——	——	——	——	——	——	——	——	——	——	——	0.83	0.34	1.51	0.16
L26_11	400	100	237	43	163	32	1.45399	0.162561	3067	3.48671	611	85	1550	310	156	26	750	130	101	21	12.4	3.5	——	——	——	——	——	——	——	——	——	——	——	——	——	——	1.2	0.46	51.1	5.2
L26_12	630	120	1460	400	385	68	3.79221	0.578892	5378	3.73062	1020	170	2780	680	298	48	1280	230	204	31	19.1	3.4	——	——	——	——	——	——	——	——	——	——	——	——	——	——	4.12	0.96	8.51	0.81
L26_13	452	73	810	130	190	35	4.26316	0.629731	3652	3.56253	920	140	1880	370	182	27	670	110	99	23	13.7	2.9	——	——	——	——	——	——	——	——	——	——	——	——	——	——	2.03	0.53	19.2	1.8
L26_14	344	65	408	84	730	120	0.558904	-0.252663	2129	3.32818	176	26	830	170	173	33	950	110	279	49	42.9	8.7	——	——	——	——	——	——	——	——	——	——	——	——	——	——	7	1.3	27.2	2.5
L26_15	1480	240	790	170	616	77	1.28247	0.108046	9457	3.97575	2010	290	5000	1100	537	83	1910	200	397	68	46	6.7	——	——	——	——	——	——	——	——	——	——	——	——	——	——	5.9	1.2	2.53	0.2
L26_16	379	51	860	220	404	69	2.12871	0.328117	8548	3.93186	2480	380	4040	670	448	66	1580	250	220	25	35.2	5.6	——	——	——	——	——	——	——	——	——	——	——	——	——	——	3.46	0.81	15.5	1.1
L26_17	404	66	1100	220	273	41	4.0293	0.60523	758.9	2.88018	58.9	9.1	294	65	57	11	349	46	84	12	11.1	2.5	——	——	——	——	——	——	——	——	——	——	——	——	——	——	2.75	0.69	9.36	0.78
L26_1_0	532	63	482	52	215	24	2.24186	0.350609	5667	3.75335	974	80	2780	200	393	37	1520	140	266	37	29	5.3	——	——	——	——	——	——	——	——	——	——	——	——	——	——	0.85	0.37	15.5	0.75
L26_1_1	513	93	1440	150	157	18	9.17197	0.962463	711	2.85187	119	12	321	26	48	5.7	223	28	44	10	5.5	1.7	——	——	——	——	——	——	——	——	——	——	——	——	——	——	1.72	0.68	1.54	0.14
L26_1_2	480	50	504	71	209	26	2.41148	0.382284	2765	3.4417	561	69	1390	140	156	14	658	71	107	18	11.6	3.1	——	——	——	——	——	——	——	——	——	——	——	——	——	——	1.68	0.7	14.7	1.1
L26_1_3	303	32	553	70	464	49	1.19181	0.0762072	2921	3.46553	579	59	1320	140	170	14	852	70	159	26	23.2	4.5	——	——	——	——	——	——	——	——	——	——	——	——	——	——	3.9	1	2.51	0.13
L26_1_4	397	43	1490	190	1140	120	1.30702	0.116281	27120	4.43329	5320	590	13700	1400	1480	120	6620	710	930	110	115	13	——	——	——	——	——	——	——	——	——	——	——	——	——	——	11.8	1.9	15.96	0.95
L26_1_5	285	41	393	57	651	84	0.603687	-0.219188	2563	3.40875	443	40	1150	120	184	21	786	77	198	28	29.8	4.6	——	——	——	——	——	——	——	——	——	——	——	——	——	——	5.7	1.6	11.86	0.86
L26_1_6	460	72	429	47	440	50	0.975	-0.0109954	2372	3.37511	272	28	1063	95	178	22	859	74	182	22	31.9	5.7	——	——	——	——	——	——	——	——	——	——	——	——	——	——	4.57	0.88	10.18	0.52
L26_1_7	1500	170	271	30	535	71	0.506542	-0.295384	8002	3.9032	1730	140	3810	330	502	44	1960	150	308	32	27.4	4.9	——	——	——	——	——	——	——	——	——	——	——	——	——	——	3.05	0.84	3.46	0.24
L26_1_8	410	60	1060	110	364	40	2.91209	0.464204	2494	3.3969	447	51	1220	110	159	15	668	65	131	19	21.2	2.9	——	——	——	——	——	——	——	——	——	——	——	——	——	——	3.34	0.92	18.9	1.1
L26_1_9	234	57	601	87	150	21	4.00667	0.602783	3287	3.5168	732	82	1600	130	179	21	776	89	83	13	13.1	2.9	——	——	——	——	——	——	——	——	——	——	——	——	——	——	0.45	0.35	9.52	0.59
L26_1_10	970	110	1790	240	569	82	3.14587	0.497741	19260	4.28466	4500	720	10000	1500	1110	130	3650	380	402	43	92	12	——	——	——	——	——	——	——	——	——	——	——	——	——	——	6.7	1.6	24.5	1.9
L26_1_11	820	130	690	160	327	63	2.11009	0.324301	2405	3.38112	328	43	1190	190	147	17	740	100	118	25	20.7	4.1	——	——	——	——	——	——	——	——	——	——	——	——	——	——	4.2	1.2	24.4	1.9
L26_1_12	570	100	612	90	1230	150	0.497561	-0.303154	5371	3.73006	826	85	2630	390	345	50	1570	190	375	67	112	19	——	——	——	——	——	——	——	——	——	——	——	——	——	——	16.3	2.7	8.46	0.68
L26_1_13	157	33	201	34	549	64	0.36612	-0.436376	7402	3.86935	694	62	3340	570	518	66	2850	290	550	52	38.6	9.4	——	——	——	——	——	——	——	——	——	——	——	——	——	——	1.92	0.64	36	2.3
L26_1_14	306	48	389	43	2100	200	0.185238	-0.73227	1371	3.13704	94	14	546	91	89	14	642	62	264	51	8.1	2.3	——	——	——	——	——	——	——	——	——	——	——	——	——	——	16.4	3.3	5.92	0.38
L26_1_15	458	75	850	120	514	63	1.6537	0.218456	4119	3.61479	660	110	1870	290	259	35	1330	160	241	32	19.3	3.8	——	——	——	——	——	——	——	——	——	——	——	——	——	——	4.1	1.1	4.24	0.28
L26_1_16	458	50	930	100	139	23	6.69065	0.825468	727.4	2.86177	84	10	307	29	48.4	7.2	288	27	56	11	7.9	2	——	——	——	——	——	——	——	——	——	——	——	——	——	——	1.05	0.56	6.95	0.61
L26_1_17	1026	99	448	66	2090	180	0.214354	-0.668868	4251	3.62849	672	57	1990	190	287	31	1302	98	346	44	59.3	6.7	——	——	——	——	——	——	——	——	——	——	——	——	——	——	26.5	3	23.4	1.5
L26_1_18	303	53	224	28	590	68	0.379661	-0.420604	2026	3.30664	220	23	840	100	136	13	830	86	215	32	32.9	5.1	——	——	——	——	——	——	——	——	——	——	——	——	——	——	5	1.2	72.6	2.9
L26_1_19	1330	210	760	100	409	43	1.85819	0.26909	2370	3.37475	392	44	1060	120	146	17	772	93	146	19	29.7	5.5	——	——	——	——	——	——	——	——	——	——	——	——	——	——	3.41	0.76	11.8	1.9
L26_1_20	188	35	424	52	154	27	2.75325	0.439845	708.3	2.85022	157	23	331	52	35.3	5	185	33	24.9	6	2.9	1.1	——	——	——	——	——	——	——	——	——	——	——	——	——	——	1.54	0.57	8.62	0.58
L26_1_21	359	88	800	150	294	54	2.72109	0.434743	2865	3.45712	790	120	1290	160	145	20	640	100	93	18	9	2.4	——	——	——	——	——	——	——	——	——	——	——	——	——	——	2.46	0.8	14.2	1.4
L26_1_22	211	52	123	24	2290	300	0.0537118	-1.26993	10174	4.00749	1720	290	5460	790	544	65	2450	350	391	82	26.1	5	——	——	——	——	——	——	——	——	——	——	——	——	——	——	19.6	3.8	35.8	3.8
L26_1_23	370	58	451	47	242	29	1.86364	0.270361	708.9	2.85058	96	13	298	35	51.9	5.9	263	34	72	13	16.8	4	——	——	——	——	——	——	——	——	——	——	——	——	——	——	2.85	0.86	10.74	0.66
L26_1_24	749	87	339	36	707	72	0.479491	-0.31922	959.6	2.98209	119	14	375	45	57.6	6.8	408	45	127	19	29	5.4	——	——	——	——	——	——	——	——	——	——	——	——	——	——	6.5	1.2	27.1	1.7
L26_1_25	437	53	468	60	810	120	0.577778	-0.238239	4013	3.60347	651	71	2020	320	232	30	1110	120	230	35	41.9	5.2	——	——	——	——	——	——	——	——	——	——	——	——	——	——	7.9	1.8	9.63	0.55
L26_1_26	2510	260	262	32	1590	160	0.16478	-0.783096	806.7	2.90671	78	14	309	52	61.7	8.5	358	39	207	26	39.6	7	——	——	——	——	——	——	——	——	——	——	——	——	——	——	8.8	1.7	10.76	0.73
L26_1_27	389	52	842	88	231	33	3.64502	0.5617	1748	3.24254	269	30	840	100	133	17	506	64	117	25	14.5	3.2	——	——	——	——	——	——	——	——	——	——	——	——	——	——	2.57	0.85	3.39	0.25
L26_1_28	790	110	1010	130	520	76	1.94231	0.288318	5370	3.72997	1260	140	2330	270	290	44	1490	250	217	37	16.6	4.7	——	——	——	——	——	——	——	——	——	——	——	——	——	——	3.4	1.1	28.6	2.7
L26_1_29	320	43	311	51	589	70	0.528014	-0.277355	2266	3.35526	193	18	932	82	157	19	984	97	221	33	34.4	5.6	——	——	——	——	——	——	——	——	——	——	——	——	——	——	8.7	1.6	64.3	4.3
L26_1_30	312	42	1450	140	132	19	10.9848	1.04079	567.4	2.75389	74.3	9.3	229	25	40.1	6.9	224	31	50	11	13.9	3.1	——	——	——	——	——	——	——	——	——	——	——	——	——	——	1.68	0.64	6.98	0.51
L26_1_31	313	38	145	18	880	100	0.164773	-0.783115	165.9	2.21985	10.5	2.5	49.1	6	10.3	2	96	17	62	15	14.9	2.6	——	——	——	——	——	——	——	——	——	——	——	——	——	——	7.7	1.4	6.78	0.42
L26_1_32	205	31	336	52	268	44	1.25373	0.0982045	1291	3.11093	99	11	615	87	83	10	494	57	154	28	15.7	3.3	——	——	——	——	——	——	——	——	——	——	——	——	——	——	2.9	1.1	15.8	1.1
L26_1_33	678	66	600	79	120	21	5	0.69897	4711	3.67311	1810	150	2170	250	167	14	564	51	86	17	18.7	3	——	——	——	——	——	——	——	——	——	——	——	——	——	——	1.76	0.62	5.85	0.34
L26_1_34	335	44	980	100	131	22	7.48092	0.873955	698.6	2.84423	78.1	9.4	304	37	49.5	5.1	267	29	48	11	11.4	2.6	——	——	——	——	——	——	——	——	——	——	——	——	——	——	0.6	0.41	5.8	0.46
L26_1_35	390	47	412	64	721	85	0.571429	-0.243038	2662	3.42521	260	30	1170	170	212	27	1020	130	255	34	22.8	5.6	——	——	——	——	——	——	——	——	——	——	——	——	——	——	5.8	1.5	4.93	0.44
L26_1_36	372	70	720	120	193	30	3.73057	0.571775	1039.8	3.01695	115	18	472	68	60.8	7.9	392	68	82	17	16.2	3.6	——	——	——	——	——	——	——	——	——	——	——	——	——	——	1.64	0.67	21.6	1.6
L26_1_37	395	63	970	180	368	60	2.63587	0.420924	1378	3.13925	126	21	572	92	94	13	586	94	159	25	26	5	——	——	——	——	——	——	——	——	——	——	——	——	——	——	3.6	1.3	4.11	0.42
L26_1_38	261	70	354	89	1600	280	0.22125	-0.655117	6422	3.80767	640	120	2260	410	422	99	3100	640	540	120	73	17	——	——	——	——	——	——	——	——	——	——	——	——	——	——	11.4	2.9	10.1	1.4
L26_1_39	346	92	101	35	740	140	0.136486	-0.86491	1721	3.23578	105	20	660	130	136	30	820	160	281	65	8.4	4.4	——	——	——	——	——	——	——	——	——	——	——	——	——	——	7.5	2	6.52	0.73
L26_1_40	388	87	970	380	461	93	2.10412	0.323071	2518	3.40106	228	37	1090	190	170	23	1030	190	185	39	25.7	7.1	——	——	——	——	——	——	——	——	——	——	——	——	——	——	3.8	1.6	4.81	0.65
L26_1_41	377	95	1370	330	31	11	44.1935	1.64536	598.1	2.77677	124	31	296	95	22.1	4.6	156	46	29	14	3.5	2.5	——	——	——	——	——	——	——	——	——	——	——	——	——	——	0.16	0.31	1.29	0.2
L26_1_42	296	44	1380	260	162	26	8.51852	0.930364	578.5	2.7623	59	11	237	34	35.5	6.5	247	29	51	13	9.9	2.5	——	——	——	——	——	——	——	——	——	——	——	——	——	——	0.86	0.52	1.74	0.14
L26_1_43	336	59	394	68	97	21	4.06186	0.608724	928.7	2.96788	242	33	445	80	42.7	7.9	199	42	31.9	9.9	8.1	2.9	——	——	——	——	——	——	——	——	——	——	——	——	——	——	2.17	0.99	29.9	2.3
L26_1_44	218	41	328	72	550	63	0.596364	-0.224489	1664	3.22115	121	23	555	75	128	25	860	130	272	59	30.9	6.3	——	——	——	——	——	——	——	——	——	——	——	——	——	——	4.6	1.2	11.7	1
L26_1_45	210	50	529	99	413	48	1.28087	0.107506	3079	3.48841	297	45	1410	240	182	22	1190	160	209	40	34.6	6.3	——	——	——	——	——	——	——	——	——	——	——	——	——	——	4.5	1.4	43.1	3.1
L26_1_46	132	29	211	39	186	24	1.13441	0.0547695	1320	3.12057	86	12	427	52	104	19	703	83	216	43	25.5	4.7	——	——	——	——	——	——	——	——	——	——	——	——	——	——	0.71	0.44	8.42	0.66
L26_1_47	599	86	820	170	891	96	0.920314	-0.0360639	5535	3.74312	453	54	2330	290	342	30	2410	300	472	73	79	11	——	——	——	——	——	——	——	——	——	——	——	——	——	——	10.7	1.8	26.8	1.7
L26_1_48	600	100	1070	170	380	54	2.81579	0.4496	2095	3.32118	395	75	1010	130	130	21	560	74	135	23	46.8	6.6	——	——	——	——	——	——	——	——	——	——	——	——	——	——	3.8	1.2	33	3.1
L26_1_49	770	130	940	170	720	120	1.30556	0.115795	6740	3.82866	1130	140	3360	800	390	85	1860	240	339	45	25.9	4.4	——	——	——	——	——	——	——	——	——	——	——	——	——	——	6.2	1.6	27.1	2.4
L26_1_50	298	55	1110	290	382	66	2.90576	0.46326	2392	3.37876	331	81	970	170	171	41	920	140	167	37	25.2	7.2	——	——	——	——	——	——	——	——	——	——	——	——	——	——	3.4	1.6	19.2	2.1
L26_1_51	660	120	320	100	1820	330	0.175824	-0.754921	2314	3.36436	239	51	800	130	135	25	1140	180	420	110	21.4	6.3	——	——	——	——	——	——	——	——	——	——	——	——	——	——	15.6	4.2	12.3	1.6
L26_1_52	1860	260	302	66	413	52	0.731235	-0.135943	12800	4.10721	3470	700	7000	1300	550	120	1780	280	202	45	20.2	5.5	——	——	——	——	——	——	——	——	——	——	——	——	——	——	5.9	1.7	6.88	0.69
L26_1_53	520	100	822	85	1250	170	0.6576	-0.182038	5725	3.75778	527	60	2380	370	398	50	2420	300	502	71	113	15	——	——	——	——	——	——	——	——	——	——	——	——	——	——	16.5	3.4	30.7	2.3
L26_1_54	680	110	680	140	830	110	0.819277	-0.0865692	903.4	2.95588	33.4	7.3	210	42	82	14	578	82	266	38	48.3	6	——	——	——	——	——	——	——	——	——	——	——	——	——	——	9.4	1.9	11.1	1
L26_1_55	1700	220	98	22	960	140	0.102083	-0.991045	11850	4.07372	2550	330	6600	1400	680	100	2020	300	299	39	14.6	2.8	——	——	——	——	——	——	——	——	——	——	——	——	——	——	9.3	1.6	10.13	0.91
L26_1_57	479	92	930	220	103	26	9.02913	0.955646	462.4	2.66502	77	24	194	39	31.4	9	160	37	25	11	7.2	3	——	——	——	——	——	——	——	——	——	——	——	——	——	——	1.71	0.93	19.3	2.6
L26_1_58	530	100	960	130	610	110	1.57377	0.196941	10150	4.00647	1680	270	5100	1400	730	190	2640	440	511	91	58	14	——	——	——	——	——	——	——	——	——	——	——	——	——	——	5.3	1.7	20.9	2.2
L29_0	600	110	290	48	67	11	4.32836	0.636323	1450	3.16137	218	37	860	240	95	21	277	44	55	11	8.5	2	——	——	——	——	——	——	——	——	——	——	——	——	——	——	0.94	0.35	5.31	0.6
L29_1	438	61	670	110	69	15	9.71014	0.987226	1317	3.11959	278	35	760	170	75	14	204	25	30	8.8	7.5	1.4	——	——	——	——	——	——	——	——	——	——	——	——	——	——	0.42	0.24	1.54	0.12
L29_2	560	92	533	81	1100	170	0.484545	-0.314665	6085	3.78426	1170	190	3040	600	355	44	1520	230	477	61	25.4	5.3	——	——	——	——	——	——	——	——	——	——	——	——	——	——	7.9	1.7	6.72	0.54
L29_3	560	110	790	100	860	130	0.918605	-0.0368714	4625	3.66511	870	160	2220	440	325	44	1210	180	298	40	26	4.9	——	——	——	——	——	——	——	——	——	——	——	——	——	——	5.13	0.93	9.39	0.86
L29_4	325	43	3430	450	561	89	6.11408	0.786331	1798	3.25479	175	25	760	120	143	19	720	100	230	32	55.2	8.2	——	——	——	——	——	——	——	——	——	——	——	——	——	——	4.88	0.92	14.49	0.9
L29_5	551	73	518	69	1370	160	0.378102	-0.422391	7365	3.86717	1340	180	3520	530	475	69	2030	270	512	66	25.9	3.8	——	——	——	——	——	——	——	——	——	——	——	——	——	——	8.6	1.5	7.44	0.58
L29_6	433	51	730	100	277	35	2.63538	0.420843	1650	3.21748	213	29	763	96	124	17	550	55	142	24	57.9	8.5	——	——	——	——	——	——	——	——	——	——	——	——	——	——	2.63	0.57	3.62	0.24
L29_7	388	59	449	71	850	120	0.528235	-0.277173	732.9	2.86504	58.9	8.7	274	51	58	10	342	52	135	25	70	12	——	——	——	——	——	——	——	——	——	——	——	——	——	——	8.5	1.5	27.8	2.3
L29_8	442	82	590	95	196	30	3.0102	0.478596	662.7	2.82132	85	12	311	97	42.7	6.9	224	40	53.5	9.6	19.2	4	——	——	——	——	——	——	——	——	——	——	——	——	——	——	2.15	0.6	13.9	1.1
L29_9	930	130	930	160	416	43	2.23558	0.34939	458.9	2.66172	36.5	6.1	154	24	34.4	5.1	234	32	94	16	36.7	6.9	——	——	——	——	——	——	——	——	——	——	——	——	——	——	5.1	1.1	4.92	0.31
L29_10	460	91	338	46	50	10	6.76	0.829947	864.4	2.93671	156	26	490	100	44.4	5.9	174	31	26.7	5.9	7.5	1.8	——	——	——	——	——	——	——	——	——	——	——	——	——	——	0.72	0.3	4.49	0.3
L29_11	283	39	564	78	555	83	1.01622	0.00698612	3471	3.54045	561	92	1710	340	230	37	970	160	194	31	24	4.1	——	——	——	——	——	——	——	——	——	——	——	——	——	——	5.8	1.2	15.7	1.3
L29_12	206	25	7800	1300	249	40	31.3253	1.4959	1497.1	3.17525	93.1	9.2	580	120	127	22	697	83	180	27	42.7	6.6	——	——	——	——	——	——	——	——	——	——	——	——	——	——	1.07	0.39	5.42	0.39
L29_13	280	38	381	84	120	21	3.175	0.501744	1074.7	3.03129	162	24	559	97	63.7	8.9	290	43	64	13	10.4	2.3	——	——	——	——	——	——	——	——	——	——	——	——	——	——	0.66	0.29	41.5	3.1
L29_14	920	110	323	55	1600	200	0.201875	-0.694917	13480	4.12969	3630	560	6370	960	680	110	2800	360	423	46	34.6	6.1	——	——	——	——	——	——	——	——	——	——	——	——	——	——	16.3	2.2	29.9	2.4
L29_15	940	110	395	67	788	91	0.501269	-0.299929	7568	3.87898	1330	160	3570	720	478	74	2190	240	391	48	78	11	——	——	——	——	——	——	——	——	——	——	——	——	——	——	11.3	1.8	3.38	0.24
L29_16	445	53	595	99	210	28	2.83333	0.452298	1967	3.2938	430	69	870	130	125	24	542	68	82	13	17	2.5	——	——	——	——	——	——	——	——	——	——	——	——	——	——	1.54	0.4	6.33	0.44
L29_17	163	27	437	62	461	54	0.947939	-0.0232195	2463	3.39146	194	37	1080	200	189	32	1000	130	190	26	24.9	5	——	——	——	——	——	——	——	——	——	——	——	——	——	——	3.3	0.84	4.45	0.34
L29_18	161	22	431	67	309	50	1.39482	0.144519	775	2.8893	61	10	283	36	68	10	363	39	89	13	14.1	2.2	——	——	——	——	——	——	——	——	——	——	——	——	——	——	3.71	0.54	6.78	0.41
L29_19	418	71	426	66	290	47	1.46897	0.167012	2048	3.31133	169	26	1000	250	129	20	750	120	147	28	20.5	3.9	——	——	——	——	——	——	——	——	——	——	——	——	——	——	3.21	0.95	18.5	1.5
L29_20	306	47	299	54	278	52	1.07554	0.0316264	2036	3.30878	203	30	740	140	133	19	960	140	245	45	20.9	3.5	——	——	——	——	——	——	——	——	——	——	——	——	——	——	1.18	0.41	9.71	0.95
L29_21	291	50	535	94	259	49	2.06564	0.315054	1066	3.02776	112	14	418	59	86	11	450	61	81	16	12.9	2.7	——	——	——	——	——	——	——	——	——	——	——	——	——	——	2	0.65	5.44	0.47
L29_22	808	86	652	83	418	59	1.55981	0.193071	2510	3.39967	271	35	1030	140	169	22	1040	160	179	23	68	10	——	——	——	——	——	——	——	——	——	——	——	——	——	——	4.79	0.81	5.11	0.43
L29_23	576	89	1080	160	840	100	1.28571	0.109144	5218	3.7175	890	120	2320	340	298	32	1710	200	306	44	26.3	3.3	——	——	——	——	——	——	——	——	——	——	——	——	——	——	5.46	0.74	8.75	0.57
L29_24	557	94	1070	320	697	81	1.53515	0.186151	4905	3.69064	740	160	2180	430	285	54	1700	270	239	51	29.5	5.7	——	——	——	——	——	——	——	——	——	——	——	——	——	——	5.7	1.2	9.21	0.91
L29_25	540	100	980	140	681	95	1.43906	0.158079	4965	3.69592	720	110	2390	590	415	85	1440	200	239	34	29.3	5.6	——	——	——	——	——	——	——	——	——	——	——	——	——	——	4.27	0.74	9.5	0.82
L29_1_0	400	100	646	94	353	78	1.83003	0.262458	1960	3.29226	368	63	830	130	142	32	620	100	123	22	22.5	5.7	——	——	——	——	——	——	——	——	——	——	——	——	——	——	3.3	1.2	7.76	0.89
L29_1_1	291	65	560	100	112	19	5	0.69897	1337	3.12613	134	20	620	130	96	18	487	99	70	16	19.5	5.1	——	——	——	——	——	——	——	——	——	——	——	——	——	——	0.93	0.46	6.27	0.87
L29_1_2	524	87	550	110	930	110	0.591398	-0.22812	3347	3.52466	287	50	1420	370	270	55	1370	220	359	69	32.3	8.5	——	——	——	——	——	——	——	——	——	——	——	——	——	——	12.2	3.7	7.97	0.76
L29_1_3	570	120	430	92	910	170	0.472527	-0.325573	4597	3.66247	560	100	2030	410	377	79	1630	250	302	64	39.6	9.1	——	——	——	——	——	——	——	——	——	——	——	——	——	——	9.8	2.7	19.4	3.5
L29_1_4	529	73	395	65	295	60	1.33898	0.126775	985	2.99344	140	33	500	120	59	11	286	54	79	20	14.7	3.8	——	——	——	——	——	——	——	——	——	——	——	——	——	——	3.7	1.1	2.73	0.38
L29_1_5	351	71	410	69	227	31	1.80617	0.256758	1029	3.01242	82	15	490	120	67	11	390	65	88	23	7.4	3.2	——	——	——	——	——	——	——	——	——	——	——	——	——	——	0.95	0.65	5.47	0.48
L29_1_6	508	82	381	67	389	48	0.979434	-0.00902463	3875	3.58827	730	120	2220	500	185	25	740	130	147	42	46	11	——	——	——	——	——	——	——	——	——	——	——	——	——	——	8	1.8	31.4	3.4
L29_1_7	860	130	459	76	910	150	0.504396	-0.297229	5240	3.71933	1000	140	2650	430	320	55	1270	170	311	48	20.9	4.4	——	——	——	——	——	——	——	——	——	——	——	——	——	——	5.3	1.2	4.09	0.38
L29_1_8	610	110	498	72	520	100	0.957692	-0.018774	2649	3.42308	470	150	1360	320	155	22	664	86	168	37	24.7	4.6	——	——	——	——	——	——	——	——	——	——	——	——	——	——	5.4	1.2	12.7	1.6
L29_1_9	456	78	1450	280	640	140	2.26562	0.355188	12730	4.10483	2910	460	6320	890	770	120	2730	320	419	69	64	12	——	——	——	——	——	——	——	——	——	——	——	——	——	——	4.3	1	4.83	0.4
L29_1_10	750	150	311	59	1550	260	0.200645	-0.697571	8530	3.93095	1510	190	4210	700	610	150	2200	380	436	90	51	10	——	——	——	——	——	——	——	——	——	——	——	——	——	——	11.5	2	26.5	3.6
L29_1_11	780	180	429	64	130	21	3.3	0.518514	517.3	2.71374	91	19	246	36	43.3	6.8	137	24	35	11	7.5	2.1	——	——	——	——	——	——	——	——	——	——	——	——	——	——	2.48	0.98	2.44	0.32
L29_1_12	890	110	650	120	231	42	2.81385	0.449301	1400	3.14613	300	47	654	95	85	12	361	63	87	17	18.6	4.5	——	——	——	——	——	——	——	——	——	——	——	——	——	——	1.72	0.66	10.8	1
L29_1_13	611	93	360	57	600	110	0.6	-0.221849	3077	3.48813	544	78	1640	270	173	23	720	100	134	25	26.1	6.6	——	——	——	——	——	——	——	——	——	——	——	——	——	——	4.9	1.5	29.5	2.8
L29_1_14	960	150	292	54	667	92	0.437781	-0.358743	3401	3.53161	980	140	1580	230	171	30	670	130	110	26	15.3	2.9	——	——	——	——	——	——	——	——	——	——	——	——	——	——	5.4	1.5	18.5	1.9
L29_1_15	412	63	345	51	480	73	0.71875	-0.143422	1928	3.28511	513	56	1030	170	93	13	292	35	64	13	28.6	5.6	——	——	——	——	——	——	——	——	——	——	——	——	——	——	7.7	1.9	32.2	2.6
L29_1_16	350	56	355	43	860	120	0.412791	-0.38427	31.02	1.49164	2.1	1.2	6.8	2.1	1.62	0.54	20.5	7.3	29	12	9	2.8	——	——	——	——	——	——	——	——	——	——	——	——	——	——	7.2	1.7	9.03	0.68
L29_1_17	850	120	740	110	1460	200	0.506849	-0.295121	343.2	2.53555	38.7	7.3	117	21	24.5	4.7	163	27	78	15	48.9	9	——	——	——	——	——	——	——	——	——	——	——	——	——	——	17.3	2.9	19.7	1.4
L29_1_18	447	73	1310	230	870	130	1.50575	0.177752	9210	3.96426	1300	190	4510	900	780	160	2620	360	460	68	84	16	——	——	——	——	——	——	——	——	——	——	——	——	——	——	7.7	1.4	12.2	1
L29_1_19	542	95	520	100	570	120	0.912281	-0.0398715	3442	3.53681	710	130	1690	360	222	39	820	170	181	49	22.7	5.9	——	——	——	——	——	——	——	——	——	——	——	——	——	——	5.3	1.4	30	3.3
L29_1_20	309	55	710	110	473	80	1.50106	0.176397	1792	3.25334	260	41	810	120	109	18	613	88	126	21	26.4	5.8	——	——	——	——	——	——	——	——	——	——	——	——	——	——	2.9	1	5.09	0.47
L29_1_21	183	44	361	83	1050	220	0.34381	-0.463682	1970	3.29447	158	25	655	78	157	32	1000	150	219	41	20	4.2	——	——	——	——	——	——	——	——	——	——	——	——	——	——	5.7	1.3	18.5	2
L29_1_22	420	81	224	36	450	81	0.497778	-0.302964	2255	3.35315	381	60	1020	130	154	24	700	110	120	18	8	2.5	——	——	——	——	——	——	——	——	——	——	——	——	——	——	2.32	0.72	7.9	0.67
L29_1_23	298	46	860	180	910	120	0.945055	-0.0245429	510.7	2.70817	24.7	5.3	144	25	35	4.9	307	40	144	32	41.5	6.9	——	——	——	——	——	——	——	——	——	——	——	——	——	——	7	1.5	4.11	0.31
L29_1_24	364	42	505	68	347	58	1.45533	0.162962	819.8	2.91371	92	14	360	47	53.8	8.6	314	36	89	17	15.7	3	——	——	——	——	——	——	——	——	——	——	——	——	——	——	1.88	0.74	32.9	2.1
L29_1_25	606	75	3420	410	399	47	8.57143	0.933053	5958	3.7751	822	99	3040	430	436	49	1660	170	294	47	69.9	8.4	——	——	——	——	——	——	——	——	——	——	——	——	——	——	1.94	0.67	17.4	1.2
L29_1_26	509	53	503	75	1830	210	0.274863	-0.560883	6602	3.81968	1140	110	3150	400	352	32	1960	210	487	61	16.9	2.9	——	——	——	——	——	——	——	——	——	——	——	——	——	——	7.6	1.6	5.37	0.37
L29_1_27	618	92	622	87	1960	250	0.317347	-0.498466	6619	3.82079	1140	120	3150	370	389	43	1940	240	439	64	30.9	5	——	——	——	——	——	——	——	——	——	——	——	——	——	——	7.3	1.8	5.57	0.46
L29_1_28	466	59	950	130	927	93	1.02481	0.0106439	1791	3.2531	166	16	742	76	138	13	745	91	208	26	49.8	7.7	——	——	——	——	——	——	——	——	——	——	——	——	——	——	7.3	1.5	17.2	1
L29_1_29	957	85	541	61	1840	160	0.294022	-0.531621	1597.2	3.20336	221	25	727	70	98.2	8.3	551	56	150	31	26.3	5.3	——	——	——	——	——	——	——	——	——	——	——	——	——	——	23.3	2.6	10.9	1.1
L29_1_30	151	36	3950	410	292	37	13.5274	1.13121	886.4	2.94763	51.7	6.7	317	30	66.7	9.3	451	58	131	21	27.1	3.6	——	——	——	——	——	——	——	——	——	——	——	——	——	——	1.61	0.75	6.21	0.36
L29_1_31	329	48	336	50	601	74	0.559068	-0.252535	1586	3.2003	124	15	567	52	117	14	778	64	215	34	39.8	5.5	——	——	——	——	——	——	——	——	——	——	——	——	——	——	5.7	1.4	9.06	0.48
L29_1_32	614	49	729	66	789	77	0.923954	-0.0343495	1389	3.1427	104	12	468	61	111	11	706	56	172	27	43.5	6.4	——	——	——	——	——	——	——	——	——	——	——	——	——	——	7	1.2	14.62	0.91
L29_1_33	545	65	3790	420	428	61	8.85514	0.947195	7429	3.87093	984	96	3350	370	515	47	2580	250	373	40	82	12	——	——	——	——	——	——	——	——	——	——	——	——	——	——	3.81	0.99	29	1.8
L29_1_34	365	43	1600	170	283	26	5.65371	0.752334	2772	3.44279	405	39	1210	110	195	18	962	93	133	15	23.5	2.9	——	——	——	——	——	——	——	——	——	——	——	——	——	——	2.98	0.82	2.44	0.18
L29_1_35	665	76	554	69	699	88	0.792561	-0.100967	739.9	2.86917	43.4	6.1	246	33	56.5	8.4	394	55	126	24	27.4	4.6	——	——	——	——	——	——	——	——	——	——	——	——	——	——	5.5	1	18.5	1.2
L29_1_36	283	37	308	37	1270	140	0.24252	-0.615253	1488	3.1726	118	12	480	48	120	13	770	100	271	30	41.3	7.2	——	——	——	——	——	——	——	——	——	——	——	——	——	——	6.8	1.3	5.77	0.3
L29_1_37	180	29	1380	110	178	29	7.75281	0.889459	2251	3.35238	469	56	1090	120	135	17	557	51	100	15	16.4	3	——	——	——	——	——	——	——	——	——	——	——	——	——	——	0.74	0.37	2.3	0.15
L29_1_38	833	82	891	96	792	85	1.125	0.0511525	499.1	2.69819	47	7.5	145	14	35.1	5	272	36	106	17	53.7	5.9	——	——	——	——	——	——	——	——	——	——	——	——	——	——	12	1.6	8.04	0.52
L29_1_39	543	55	704	75	1390	130	0.506475	-0.295442	1538	3.18696	100	13	455	53	107	13	876	85	254	30	113	13	——	——	——	——	——	——	——	——	——	——	——	——	——	——	11.1	1.9	9.53	0.45
L29_1_40	464	58	403	52	306	42	1.31699	0.119584	1053.5	3.02263	155	19	439	42	68.5	8.8	391	48	55	14	14.2	3	——	——	——	——	——	——	——	——	——	——	——	——	——	——	3.27	0.88	9.64	0.65
L29_1_41	659	75	415	58	295	39	1.40678	0.148226	3445	3.53719	1070	110	1510	160	175	20	690	82	76	15	17.8	4.1	——	——	——	——	——	——	——	——	——	——	——	——	——	——	3.04	0.98	11.64	0.72
L29_1_42	635	90	612	77	1290	130	0.474419	-0.323838	6456	3.80996	970	120	2820	270	356	32	2310	280	364	38	31.6	5	——	——	——	——	——	——	——	——	——	——	——	——	——	——	6.8	1.5	3.9	0.24
L29_1_43	378	57	220	35	870	140	0.252874	-0.597097	478.4	2.67979	21.4	5.1	133	20	36	5.5	288	39	101	22	24.8	4.6	——	——	——	——	——	——	——	——	——	——	——	——	——	——	8.9	1.8	12.04	0.79
L29_1_44	800	100	325	46	1180	120	0.275424	-0.559999	2885	3.46015	483	53	1250	140	182	18	970	100	195	26	45.6	7.8	——	——	——	——	——	——	——	——	——	——	——	——	——	——	11.6	2.5	33.9	2
L29_1_45	500	52	681	75	320	40	2.12812	0.327997	2709	3.43281	566	55	1180	110	156	21	807	90	108	20	18.8	5.3	——	——	——	——	——	——	——	——	——	——	——	——	——	——	1.76	0.81	9.91	0.63
L29_1_46	268	28	287	44	1140	130	0.251754	-0.599023	3330	3.52244	325	39	1100	140	225	29	1680	190	387	48	21.4	4.8	——	——	——	——	——	——	——	——	——	——	——	——	——	——	4.7	1.2	1.26	0.15
L29_1_47	681	76	1240	120	369	52	3.36043	0.526395	4183	3.62149	853	97	1920	160	240	24	1170	120	159	27	19.8	3.7	——	——	——	——	——	——	——	——	——	——	——	——	——	——	2.86	0.95	21.6	1.1
L29_1_48	388	65	476	50	514	71	0.92607	-0.0333562	1216	3.08493	62	11	380	46	87	11	687	98	141	25	17.1	3.6	——	——	——	——	——	——	——	——	——	——	——	——	——	——	5	1.4	7.66	0.5
L29_1_49	298	48	2200	230	428	59	5.14019	0.710979	9254	3.96633	1800	160	4070	370	574	46	2810	260	301	35	58.2	8.4	——	——	——	——	——	——	——	——	——	——	——	——	——	——	4	1.2	12.84	0.74
L29_1_50	393	59	550	69	344	42	1.59884	0.203804	1901	3.27898	164	13	860	140	130	14	747	84	117	16	21.2	4.2	——	——	——	——	——	——	——	——	——	——	——	——	——	——	2.39	0.88	14.86	0.91
L29_1_51	359	44	575	74	230	30	2.5	0.39794	269.2	2.43008	18.5	4.7	89	12	18.7	3.4	143	19	49	13	8.8	2.3	——	——	——	——	——	——	——	——	——	——	——	——	——	——	3.2	1	9.53	0.55
L29_1_52	212	44	1010	120	276	38	3.65942	0.563412	1694	3.22891	209	23	723	75	137	14	625	56	110	21	26.2	5	——	——	——	——	——	——	——	——	——	——	——	——	——	——	4.3	1.2	31.1	2.4
L29_1_53	522	63	605	59	41.3	8.2	14.6489	1.16581	1216.7	3.08518	479	47	570	63	38.7	4.9	129	23	11.9	5.7	4.6	1.6	——	——	——	——	——	——	——	——	——	——	——	——	——	——	0.2	0.23	5.76	0.4
L29_1_54	722	94	197	24	2300	240	0.0856522	-1.06726	317.6	2.50188	31.8	6.3	114	16	21.8	4.2	150	20	62	14	11.1	2.4	——	——	——	——	——	——	——	——	——	——	——	——	——	——	52.6	6.3	5.31	0.39
L29_1_55	417	53	510	49	701	82	0.727532	-0.138148	1919	3.28307	234	24	815	62	129	11	741	80	157	24	27.5	4.3	——	——	——	——	——	——	——	——	——	——	——	——	——	——	7.2	1.6	8.48	0.58
L29_1_56	250	39	447	51	436	45	1.02523	0.010821	734.5	2.86599	47	8.8	256	20	57.5	7.3	374	41	127	26	20.3	3.4	——	——	——	——	——	——	——	——	——	——	——	——	——	——	4.28	0.99	35.5	1.6
L32_1_0	1062	98	544	49	407	34	1.33661	0.126004	4362	3.63969	1052	76	1610	170	340	27	1360	100	273	31	30	5	——	——	——	——	——	——	——	——	——	——	——	——	——	——	3.1	1.1	3.78	0.2
L32_1_1	1100	130	1260	190	337	40	3.73887	0.572741	6557	3.81671	1810	160	2380	230	417	43	1950	210	267	32	35.2	4.6	——	——	——	——	——	——	——	——	——	——	——	——	——	——	2.71	0.84	2.64	0.17
L32_1_2	612	67	1350	130	171	23	7.89474	0.897338	1491.6	3.17365	347	32	538	68	104.6	9.3	502	47	74	16	19.5	4	——	——	——	——	——	——	——	——	——	——	——	——	——	——	1.11	0.45	2.36	0.15
L32_1_3	950	110	537	59	700	64	0.767143	-0.115124	6641	3.82223	1380	130	2480	240	501	56	2280	210	403	43	46.7	5.7	——	——	——	——	——	——	——	——	——	——	——	——	——	——	5.4	1.4	6.64	0.51
L32_1_4	551	52	1950	170	218	23	8.94495	0.951578	2675	3.42732	647	59	1050	120	174	17	804	76	121	19	22.2	3.7	——	——	——	——	——	——	——	——	——	——	——	——	——	——	1.61	0.72	3.51	0.21
L32_1_5	779	91	1230	120	242	24	5.08264	0.70609	2658	3.42455	662	71	934	92	180	17	882	85	155	21	31.7	4.4	——	——	——	——	——	——	——	——	——	——	——	——	——	——	2.27	0.63	4.02	0.24
L32_1_6	549	60	1070	100	219	25	4.88584	0.68894	1408	3.1486	291	34	521	55	110	13	486	47	102	17	18.8	3.4	——	——	——	——	——	——	——	——	——	——	——	——	——	——	2.24	0.71	4.85	0.27
L32_1_7	1010	100	636	90	578	54	1.10035	0.0415293	6835	3.83474	1430	120	2820	270	505	52	2080	200	390	54	38	5.6	——	——	——	——	——	——	——	——	——	——	——	——	——	——	4.5	1.1	7.95	0.5
L32_1_8	637	76	990	100	231	30	4.28571	0.632023	2029	3.30728	438	42	800	73	139	14	652	63	109	18	24.2	4.1	——	——	——	——	——	——	——	——	——	——	——	——	——	——	1.65	0.73	6.27	0.39
L32_1_9	629	74	1020	110	195	29	5.23077	0.718566	1545	3.18893	297	25	643	68	110	14	495	56	120	20	17.7	3.1	——	——	——	——	——	——	——	——	——	——	——	——	——	——	1.04	0.53	5.94	0.4
L32_1_10	810	89	1400	140	365	40	3.83562	0.583835	1546	3.18921	232	27	621	50	113	15	580	56	187	24	39.2	6.1	——	——	——	——	——	——	——	——	——	——	——	——	——	——	2.64	0.56	3.12	0.2
L32_1_11	900	140	565	72	368	35	1.53533	0.186201	3971	3.5989	703	70	1960	250	228	29	1080	130	209	31	20.7	4.1	——	——	——	——	——	——	——	——	——	——	——	——	——	——	2.6	1.1	2.93	0.25
L32_1_12	920	110	950	100	341	35	2.78592	0.444969	6079	3.78383	1272	85	3070	240	357	30	1380	120	247	23	28.6	4.8	——	——	——	——	——	——	——	——	——	——	——	——	——	——	1.88	0.76	5.71	0.33
L32_1_13	980	130	670	100	336	54	1.99405	0.299736	3994	3.60141	782	66	1940	280	262	35	1010	140	192	35	23.7	4.9	——	——	——	——	——	——	——	——	——	——	——	——	——	——	2.34	0.95	2.64	0.23
L32_1_14	584	68	1610	230	175	25	9.2	0.963788	2226	3.34753	463	45	1036	97	133	25	594	98	90	19	18.3	3.1	——	——	——	——	——	——	——	——	——	——	——	——	——	——	1.4	0.63	2.37	0.2
L32_1_15	1070	130	474	52	543	41	0.872928	-0.0590215	6712	3.82685	1300	120	3280	310	382	33	1750	130	337	41	27.9	4.4	——	——	——	——	——	——	——	——	——	——	——	——	——	——	3.53	0.81	5.31	0.4
L32_1_16	839	83	1100	120	297	34	3.7037	0.568636	5301	3.72436	1073	99	2700	260	306	25	1222	99	202	27	26.9	4.6	——	——	——	——	——	——	——	——	——	——	——	——	——	——	1.65	0.72	5.11	0.31
L32_1_17	970	100	575	61	910	81	0.631868	-0.199374	9452	3.97552	1670	140	4810	420	612	64	2360	180	472	54	48.4	8.3	——	——	——	——	——	——	——	——	——	——	——	——	——	——	6	1.3	8.17	0.36
L32_1_18	560	76	1720	180	342	38	5.02924	0.701502	3845	3.5849	816	79	2000	250	230	30	799	67	146	24	26.9	4.3	——	——	——	——	——	——	——	——	——	——	——	——	——	——	3.8	1	9.96	0.59
L32_1_19	325	38	495	55	534	50	0.926966	-0.0329361	3018	3.47972	264	22	1350	140	224	20	1180	130	250	37	30.5	5.3	——	——	——	——	——	——	——	——	——	——	——	——	——	——	4.8	1.1	13.29	0.74
L32_1_20	682	64	1050	94	706	42	1.48725	0.172385	6258	3.79644	1107	81	3200	240	381	31	1570	140	315	37	35.3	4.6	——	——	——	——	——	——	——	——	——	——	——	——	——	——	4.04	0.93	14.57	0.67
L32_1_21	317	55	1370	160	360	68	3.80556	0.580418	2174	3.33726	367	42	1050	140	127	13	630	83	130	25	29	5.5	——	——	——	——	——	——	——	——	——	——	——	——	——	——	2.53	0.87	3.19	0.26
L32_1_22	989	94	607	69	431	41	1.40835	0.148711	4808	3.68196	840	79	2430	220	288	23	1250	100	220	26	26	3.9	——	——	——	——	——	——	——	——	——	——	——	——	——	——	2.73	0.87	6.68	0.35
L32_1_23	860	84	1490	150	359	45	4.15042	0.618092	3578	3.55364	614	64	1870	220	241	28	853	86	196	26	46.2	9.8	——	——	——	——	——	——	——	——	——	——	——	——	——	——	1.73	0.75	3.78	0.28
L32_1_24	764	73	481	65	2420	210	0.19876	-0.70167	6410	3.80686	980	120	3160	310	390	35	1880	150	654	88	27.4	4.5	——	——	——	——	——	——	——	——	——	——	——	——	——	——	11.7	2.3	34.9	2.2
L32_1_25	814	78	1450	160	496	43	2.92339	0.465886	2029	3.30728	259	21	941	63	144	15	685	63	209	27	46.5	7.5	——	——	——	——	——	——	——	——	——	——	——	——	——	——	3.4	1	3.67	0.24
L32_1_26	784	57	1290	120	429	48	3.00699	0.478132	2326	3.36661	313	27	1150	130	146	14	717	73	174	28	49.9	6.7	——	——	——	——	——	——	——	——	——	——	——	——	——	——	2.22	0.63	3.33	0.21
L32_1_27	1190	120	1410	170	535	68	2.63551	0.420865	11548	4.06251	2410	260	6380	690	608	57	2150	180	335	40	56.7	5.9	——	——	——	——	——	——	——	——	——	——	——	——	——	——	3.4	1	5.65	0.3
L32_1_28	534	64	1190	110	228	28	5.2193	0.717612	985.3	2.99357	153	15	467	48	65.3	8	300	36	56	12	18.4	3.9	——	——	——	——	——	——	——	——	——	——	——	——	——	——	1.45	0.52	4.2	0.32
L32_1_29	753	91	1550	180	431	67	3.59629	0.555854	1820	3.26007	232	23	879	86	120	10	589	59	166	24	46.2	6.5	——	——	——	——	——	——	——	——	——	——	——	——	——	——	2.69	0.72	3.27	0.19
L32_1_30	624	71	771	72	392	43	1.96684	0.293768	6559	3.81684	1300	100	3410	310	399	45	1450	160	221	29	29.8	5.1	——	——	——	——	——	——	——	——	——	——	——	——	——	——	1.38	0.65	7.05	0.43
L32_1_31	664	80	386	67	287	41	1.34495	0.128705	4605	3.66323	1000	76	2590	300	263	29	752	72	93	17	18.5	4.1	——	——	——	——	——	——	——	——	——	——	——	——	——	——	2.92	0.96	7.44	0.53
L32_1_32	906	99	879	92	253	29	3.47431	0.540868	3632	3.56015	862	99	1870	170	195	16	705	88	108	15	26.3	5.8	——	——	——	——	——	——	——	——	——	——	——	——	——	——	1.84	0.56	5.83	0.43
L32_1_33	688	71	471	58	174	21	2.7069	0.432472	2811	3.44886	662	57	1540	140	143	14	466	37	63	12	6.8	1.7	——	——	——	——	——	——	——	——	——	——	——	——	——	——	1.23	0.5	6.89	0.42
L32_1_34	1030	110	750	100	450	47	1.66667	0.221849	1078	3.03262	149	15	507	54	78	11	344	47	103	18	38.3	7.4	——	——	——	——	——	——	——	——	——	——	——	——	——	——	5.7	1.7	3.22	0.24
L32_1_35	893	74	1600	130	279	38	5.73477	0.758516	8337	3.92101	1720	120	4460	460	507	57	1650	160	211	24	45	7.9	——	——	——	——	——	——	——	——	——	——	——	——	——	——	2.92	0.73	2.39	0.16
L32_1_36	909	77	526	57	453	52	1.16115	0.0648875	4204	3.62366	714	60	2100	190	260	22	1130	110	216	24	32	6.2	——	——	——	——	——	——	——	——	——	——	——	——	——	——	2.02	0.74	4.71	0.27
L32_1_37	703	82	1430	150	220	28	6.5	0.812913	2917	3.46494	504	44	1530	170	172	16	711	89	112	14	23.2	4.6	——	——	——	——	——	——	——	——	——	——	——	——	——	——	2.03	0.59	3.92	0.27
L32_1_38	723	78	708	75	413	43	1.71429	0.234083	6265	3.79692	1380	120	3270	280	385	32	1230	110	187	25	30.2	5.7	——	——	——	——	——	——	——	——	——	——	——	——	——	——	3.2	1.1	8.21	0.41
L32_1_39	845	85	1570	170	459	56	3.42048	0.534087	2173	3.33706	314	33	943	88	144	13	772	71	169	23	51.3	8.4	——	——	——	——	——	——	——	——	——	——	——	——	——	——	2.36	0.61	3.56	0.24
L32_1_40	690	68	1290	130	216	30	5.97222	0.776136	2322	3.36586	408	39	1077	93	162	18	675	69	111	17	26.9	5.7	——	——	——	——	——	——	——	——	——	——	——	——	——	——	1.78	0.58	5.77	0.36
L32_1_41	1320	100	1140	140	386	46	2.95337	0.470318	5623	3.74997	1110	120	2670	240	353	38	1490	110	238	29	43.7	7.3	——	——	——	——	——	——	——	——	——	——	——	——	——	——	2.66	0.86	7.83	0.42
L32_1_42	1430	160	651	58	626	63	1.03994	0.0170067	11714	4.06871	2420	240	6110	700	674	66	2510	230	335	36	79.5	9.1	——	——	——	——	——	——	——	——	——	——	——	——	——	——	4.36	0.9	6.98	0.44
L32_1_43	882	74	1380	140	282	33	4.89362	0.68963	4288	3.63225	885	88	2010	160	293	28	1100	110	171	22	36.5	4.7	——	——	——	——	——	——	——	——	——	——	——	——	——	——	0.96	0.63	1.53	0.15
L32_1_44	539	60	1720	150	230	29	7.47826	0.873801	3020	3.48001	639	59	1520	180	180	18	681	57	96	14	26.2	3.5	——	——	——	——	——	——	——	——	——	——	——	——	——	——	1.46	0.67	3.95	0.22
L32_1_45	800	92	1350	120	472	62	2.86017	0.456392	1681	3.22557	254	37	695	84	107	13	625	70	157	24	41.5	8.1	——	——	——	——	——	——	——	——	——	——	——	——	——	——	2.56	0.81	3.61	0.32
L32_1_46	1029	95	587	63	647	68	0.907264	-0.0422662	7723	3.88779	1358	88	3760	280	505	46	2100	230	336	46	47.4	7.5	——	——	——	——	——	——	——	——	——	——	——	——	——	——	3.5	1.1	5.94	0.46
L32_1_47	1290	190	1610	140	312	37	5.16026	0.712671	7846	3.89465	1660	120	4170	430	426	40	1590	120	208	23	37.7	8	——	——	——	——	——	——	——	——	——	——	——	——	——	——	2.52	0.73	3.91	0.2
L32_1_48	912	94	1560	170	446	44	3.49776	0.54379	1788	3.25237	272	29	802	75	129	11	585	55	170	24	38.6	6.3	——	——	——	——	——	——	——	——	——	——	——	——	——	——	2.21	0.65	3.51	0.26
L32_1_49	638	74	465	47	308	46	1.50974	0.178902	4387	3.64217	1104	92	2320	160	214	18	749	82	85	15	16.5	3.5	——	——	——	——	——	——	——	——	——	——	——	——	——	——	2.56	0.82	8.04	0.45
L32_1_50	960	85	563	59	473	49	1.19027	0.0756473	4272	3.63063	765	71	2020	210	257	21	1230	110	201	23	29.4	6.1	——	——	——	——	——	——	——	——	——	——	——	——	——	——	2.17	0.84	6.91	0.41
L32_1_51	658	63	1270	110	241	31	5.26971	0.721787	2356	3.37218	390	38	1150	140	147	16	669	57	125	19	23.4	4.4	——	——	——	——	——	——	——	——	——	——	——	——	——	——	1.53	0.58	4.88	0.32
L32_1_52	879	73	1410	130	1480	160	0.952703	-0.0210426	10361	4.0154	1700	140	4970	400	601	37	3090	280	601	58	125	11	——	——	——	——	——	——	——	——	——	——	——	——	——	——	12.9	1.7	6.58	0.33
L32_1_53	990	110	1580	160	331	33	4.77341	0.678829	7218	3.85842	1490	130	3620	290	408	35	1700	140	254	26	45.3	6.1	——	——	——	——	——	——	——	——	——	——	——	——	——	——	2.23	0.7	3.55	0.21
L32_1_54	750	73	501	70	362	41	1.38398	0.141129	6117	3.78654	1520	160	3230	340	305	39	1062	90	167	28	25.1	4	——	——	——	——	——	——	——	——	——	——	——	——	——	——	4.4	1.1	10.24	0.65
L32_1_55	817	70	1440	150	380	40	3.78947	0.578579	1788	3.25237	262	28	811	86	122	13	593	53	158	21	38.1	7.1	——	——	——	——	——	——	——	——	——	——	——	——	——	——	1.79	0.74	3.01	0.18
L32_1_56	490	54	1160	140	365	51	3.17808	0.502165	2053	3.31239	302	28	1070	150	117	12	564	63	130	19	28.1	3.9	——	——	——	——	——	——	——	——	——	——	——	——	——	——	3.23	0.84	2.38	0.15
L32_1_57	1013	88	576	59	499	48	1.15431	0.0623219	4448	3.64816	752	67	2110	190	256	21	1330	100	262	34	29.8	5.6	——	——	——	——	——	——	——	——	——	——	——	——	——	——	2.25	0.85	5.88	0.28
L32_1_58	891	98	845	78	636	54	1.32862	0.1234	9474	3.97653	2070	240	4890	450	494	44	2020	200	299	30	30.9	4.3	——	——	——	——	——	——	——	——	——	——	——	——	——	——	5.1	1.3	5.93	0.34
L32_1_59	720	76	376	39	227	25	1.65639	0.219162	3292	3.51746	828	75	1780	140	157	14	527	63	63	10	9.9	2.1	——	——	——	——	——	——	——	——	——	——	——	——	——	——	2.54	0.86	5.17	0.36
L32_1_60	679	52	760	77	366	34	2.0765	0.317333	4682	3.67043	1052	95	2340	160	239	19	1051	86	158	24	21.6	4.8	——	——	——	——	——	——	——	——	——	——	——	——	——	——	1.83	0.71	11.31	0.79
L32_1_61	1030	110	469	56	396	45	1.18434	0.0734777	5692	3.75526	1140	110	2790	260	322	26	1440	110	205	22	25.2	4	——	——	——	——	——	——	——	——	——	——	——	——	——	——	2.25	0.68	2.63	0.19
L32_1_62	876	92	440	44	534	55	0.82397	-0.0840886	7569	3.87904	1430	140	3620	280	429	47	2090	180	281	31	32.5	5.4	——	——	——	——	——	——	——	——	——	——	——	——	——	——	3.8	1.1	6.26	0.41
L32_1_63	911	78	617	57	401	45	1.53865	0.187141	5180	3.71433	1027	86	2560	240	283	25	1310	110	223	30	22.9	3.6	——	——	——	——	——	——	——	——	——	——	——	——	——	——	3.46	0.91	3.61	0.24
L32_1_64	793	98	1620	170	456	43	3.55263	0.55055	2977	3.47378	461	46	1320	130	172	14	1024	88	226	22	43.2	6.5	——	——	——	——	——	——	——	——	——	——	——	——	——	——	2.74	0.68	4	0.25
L32_1_65	1350	140	1370	130	1100	91	1.24545	0.0953279	9411	3.97364	1690	130	4480	370	551	54	2690	210	376	28	80	10	——	——	——	——	——	——	——	——	——	——	——	——	——	——	6.3	1.2	3.27	0.22
L32_1_66	838	86	1240	120	300	27	4.13333	0.6163	5050	3.70329	1095	81	2490	230	265	22	1200	120	138	17	30.8	4.5	——	——	——	——	——	——	——	——	——	——	——	——	——	——	1.69	0.69	4.48	0.29
L32_1_67	931	99	799	79	482	59	1.65768	0.2195	4922	3.69214	834	60	2430	240	268	21	1390	100	221	31	30	4.3	——	——	——	——	——	——	——	——	——	——	——	——	——	——	2.09	0.71	2.63	0.19
L32_1_68	1060	110	576	60	748	82	0.770053	-0.113479	7171	3.85558	1310	130	3650	330	381	32	1830	160	269	31	41	6.1	——	——	——	——	——	——	——	——	——	——	——	——	——	——	4.2	1	8.07	0.43
L32_1_69	575	71	1380	130	252	27	5.47619	0.738479	2750	3.43933	535	45	1370	130	159	15	686	69	101	15	20.2	3.4	——	——	——	——	——	——	——	——	——	——	——	——	——	——	1.81	0.73	4.62	0.25
L32_1_70	372	51	567	57	381	51	1.48819	0.172658	5747	3.75944	1000	96	2730	290	347	38	1670	120	244	26	52.5	8.2	——	——	——	——	——	——	——	——	——	——	——	——	——	——	4.7	1.1	13.57	0.7
L32_1_71	750	110	1310	130	223	29	5.87444	0.768966	2829	3.45163	455	42	1440	140	164	18	770	91	133	21	22.9	4.1	——	——	——	——	——	——	——	——	——	——	——	——	——	——	1.78	0.68	4.58	0.29
L32_1_72	706	75	1040	84	550	60	1.89091	0.276671	6512	3.81371	1140	100	3410	390	352	32	1610	160	256	31	26.9	5	——	——	——	——	——	——	——	——	——	——	——	——	——	——	3.52	0.97	2.81	0.19
L32_1_73	1274	95	1590	150	353	34	4.50425	0.653622	8669	3.93797	1700	190	4410	500	429	50	2130	230	248	34	48.5	6.9	——	——	——	——	——	——	——	——	——	——	——	——	——	——	2.84	0.87	4.12	0.27
L32_1_74	2060	180	28.6	7.4	1710	140	0.0167251	-1.77663	26710	4.42667	4680	420	12700	1300	1510	120	7820	640	1250	130	464	44	——	——	——	——	——	——	——	——	——	——	——	——	——	——	9.8	1.7	4.48	0.25
L32_1_75	1530	160	1570	150	269	36	5.83643	0.766147	4701	3.67219	912	85	2370	250	265	25	1154	98	149	22	36.1	4.9	——	——	——	——	——	——	——	——	——	——	——	——	——	——	2.51	0.72	3.71	0.28
L32_1_76	1240	120	620	53	696	59	0.890805	-0.0502176	8413	3.92495	1530	150	4090	290	513	46	2280	220	400	53	46.9	5.8	——	——	——	——	——	——	——	——	——	——	——	——	——	——	4.8	1.3	8.32	0.5
L32_1_77	716	93	1150	110	190	21	6.05263	0.781944	1991	3.29907	316	26	990	110	116	12	569	51	107	17	21.4	2.9	——	——	——	——	——	——	——	——	——	——	——	——	——	——	0.92	0.45	4.79	0.27
L32_1_78	1030	100	1120	100	407	44	2.75184	0.439624	4405	3.64395	881	77	2190	200	254	28	1080	91	150	23	35.6	4	——	——	——	——	——	——	——	——	——	——	——	——	——	——	3	1	3.11	0.17
L32_1_79	832	78	416	53	244	30	1.70492	0.231704	4589	3.66172	1110	120	2420	280	222	23	837	86	113	21	17.2	2.9	——	——	——	——	——	——	——	——	——	——	——	——	——	——	3.7	1	7.99	0.6
L32_1_80	749	77	399	63	258	30	1.54651	0.189353	5107	3.70817	1260	110	2660	310	264	26	923	89	111	15	17.1	3.2	——	——	——	——	——	——	——	——	——	——	——	——	——	——	2.87	0.78	7.76	0.47
L32_1_81	591	79	940	110	193	22	4.87047	0.687571	2128	3.32797	337	25	1100	130	128	15	563	53	110	19	21.8	3.3	——	——	——	——	——	——	——	——	——	——	——	——	——	——	1.62	0.53	5.67	0.42
L32_1_82	1100	120	538	71	477	59	1.12788	0.0522639	7060	3.8488	1300	130	3430	280	470	57	1860	170	298	42	32.3	5.5	——	——	——	——	——	——	——	——	——	——	——	——	——	——	3.08	0.82	6.04	0.36
L32_1_83	366	42	1390	140	246	31	5.65041	0.75208	2271	3.35622	381	31	1082	87	126	11	682	67	129	21	26	3.7	——	——	——	——	——	——	——	——	——	——	——	——	——	——	2.17	0.75	2.98	0.19
L32_1_84	975	71	728	86	425	47	1.71294	0.233742	5468	3.73783	890	72	2850	290	358	34	1370	110	210	29	26	3.9	——	——	——	——	——	——	——	——	——	——	——	——	——	——	2.96	0.84	4.39	0.28
L32_1_85	1120	120	537	77	819	78	0.655678	-0.18331	9844	3.99317	1750	170	4730	520	584	51	2780	270	421	45	50.5	7.6	——	——	——	——	——	——	——	——	——	——	——	——	——	——	6.1	1.4	9.02	0.59
L32_1_86	583	80	1430	120	196	24	7.29592	0.86308	5520	3.74194	886	91	3280	450	284	30	1070	100	156	21	21.8	2.8	——	——	——	——	——	——	——	——	——	——	——	——	——	——	1.27	0.5	4.66	0.3
L32_1_87	970	100	1060	110	210	25	5.04762	0.703087	5736	3.75861	1190	150	2990	410	296	37	1260	170	183	27	25.9	4.9	——	——	——	——	——	——	——	——	——	——	——	——	——	——	1.47	0.71	5.38	0.53
L32_1_88	699	72	1270	210	176	22	7.21591	0.858291	2557	3.40773	410	47	1380	240	134	17	633	66	104	16	22.3	4.4	——	——	——	——	——	——	——	——	——	——	——	——	——	——	1.36	0.56	5.82	0.44
L32_1_89	720	110	499	72	539	69	0.925788	-0.0334882	7994	3.90276	1400	130	4230	540	484	65	1880	250	277	35	22.5	3.9	——	——	——	——	——	——	——	——	——	——	——	——	——	——	3.35	0.8	12.67	0.82
L32_1_90	1008	92	752	90	271	31	2.77491	0.443249	3899	3.59095	813	71	1960	180	255	25	871	62	153	15	20.3	3.6	——	——	——	——	——	——	——	——	——	——	——	——	——	——	1.93	0.68	2.31	0.17
L32_1_91	728	86	418	50	224	25	1.86607	0.270928	4360	3.63949	1080	120	2380	280	217	27	683	69	102	18	12.8	2.3	——	——	——	——	——	——	——	——	——	——	——	——	——	——	3.04	0.82	8.2	0.52
L32_1_92	1090	160	700	110	599	66	1.16861	0.0676712	15468	4.18943	2860	280	8190	950	828	88	3590	470	518	61	61.8	6.6	——	——	——	——	——	——	——	——	——	——	——	——	——	——	4.49	0.8	7.44	0.55
L32_1_93	875	78	1170	110	252	24	4.64286	0.666785	5918	3.77217	1360	130	2940	270	318	25	1300	120	205	28	29.5	5.5	——	——	——	——	——	——	——	——	——	——	——	——	——	——	1.65	0.56	3.94	0.27
L32_1_94	527	73	1050	130	362	39	2.90055	0.462481	4320	3.63548	879	98	2140	270	241	27	1060	110	179	22	25.7	3.9	——	——	——	——	——	——	——	——	——	——	——	——	——	——	3	0.83	2.41	0.17
L32_1_95	1040	150	482	63	426	58	1.13146	0.0536374	5568	3.7457	1000	100	2790	420	338	43	1440	150	275	44	22	3.7	——	——	——	——	——	——	——	——	——	——	——	——	——	——	2.4	0.65	3.83	0.41
L32_1_96	1060	180	590	100	425	50	1.38824	0.142463	6694	3.82569	1270	170	3240	380	404	49	1780	220	305	45	28.1	4.4	——	——	——	——	——	——	——	——	——	——	——	——	——	——	2.91	0.72	5.6	0.48
L32_1_97	955	86	676	75	474	57	1.42616	0.154168	4863	3.6869	843	78	2380	240	280	30	1360	130	249	36	26.7	4	——	——	——	——	——	——	——	——	——	——	——	——	——	——	2.76	0.72	3.89	0.26
L32_1_98	653	97	577	89	277	40	2.08303	0.318696	4739	3.67569	1180	130	2340	340	274	34	945	98	135	19	16.1	2.6	——	——	——	——	——	——	——	——	——	——	——	——	——	——	3.22	0.74	7.17	0.53
L32_1_99	850	100	1330	160	273	38	4.87179	0.687689	4695	3.67164	925	78	2310	230	280	28	1180	120	210	30	27	3.8	——	——	——	——	——	——	——	——	——	——	——	——	——	——	2.01	0.64	5.14	0.35
L32_1_100	770	66	1650	140	497	55	3.31992	0.521128	2145	3.33143	299	29	852	67	154	19	840	100	229	30	47	6.8	——	——	——	——	——	——	——	——	——	——	——	——	——	——	3.3	1	4.24	0.27
L32_1_101	934	96	710	100	465	50	1.52688	0.183805	5074	3.70535	999	82	2360	230	295	26	1420	100	274	32	33	5.3	——	——	——	——	——	——	——	——	——	——	——	——	——	——	2.45	0.82	3	0.17
L32_1_102	705	69	335	36	462	38	0.725108	-0.139597	5124	3.70961	1035	72	2510	200	296	23	1283	99	239	34	16.4	3.7	——	——	——	——	——	——	——	——	——	——	——	——	——	——	4.7	1	4.56	0.25
L32_1_103	695	72	438	67	401	51	1.09227	0.0383297	5331	3.72681	1340	120	2640	250	261	16	1090	110	147	26	15.8	3.7	——	——	——	——	——	——	——	——	——	——	——	——	——	——	3.33	0.89	8.79	0.54
L32_1_104	501	61	821	68	649	51	1.26502	0.102098	9518	3.97855	2010	220	4560	510	558	52	2390	230	418	43	26	3.8	——	——	——	——	——	——	——	——	——	——	——	——	——	——	3.41	0.99	3.21	0.2
L32_1_105	638	60	432	49	308	31	1.4026	0.146933	4465	3.64982	1131	93	2200	200	254	23	880	110	138	22	18.2	3.4	——	——	——	——	——	——	——	——	——	——	——	——	——	——	2.17	0.73	6.97	0.35
L32_1_106	955	97	442	48	644	50	0.686335	-0.163464	9764	3.98963	1870	140	4770	540	574	53	2550	210	480	74	38.8	5.7	——	——	——	——	——	——	——	——	——	——	——	——	——	——	4.7	1	6.27	0.37
L32_1_107	2080	200	24.7	6.1	2160	220	0.0114352	-1.94176	28070	4.44824	5130	340	12190	950	1680	120	9070	790	1770	150	478	41	——	——	——	——	——	——	——	——	——	——	——	——	——	——	10.2	1.6	4.69	0.22
L35_0	300	27	860	130	575	62	1.49565	0.174831	2310	3.36361	132	12	932	88	176	16	1070	110	211	21	46.6	5.5	——	——	——	——	——	——	——	——	——	——	——	——	——	——	5.99	0.72	16.97	0.9
L35_1	260	41	1720	300	293	36	5.87031	0.768661	422.1	2.62542	20.9	3.1	138	14	28.2	3.4	235	24	74	10	15.7	1.8	——	——	——	——	——	——	——	——	——	——	——	——	——	——	4.02	0.68	6.17	0.45
L35_2	256	29	666	91	717	93	0.92887	-0.0320449	225.6	2.35334	5.1	1.3	56.9	7.7	20.6	3.1	143	16	74	11	17.1	2.7	——	——	——	——	——	——	——	——	——	——	——	——	——	——	14.5	1.5	14.76	0.96
L35_3	646	85	860	120	1000	120	0.86	-0.0655015	258.2	2.41196	30.9	4.7	104	12	15.3	2.1	108	18	39	5.1	21.7	2.8	——	——	——	——	——	——	——	——	——	——	——	——	——	——	18.6	2	2.97	0.26
L35_4	1120	140	690	76	1090	130	0.633028	-0.198577	570.7	2.75641	64.7	9	228	30	36	4.7	242	36	113	14	22.2	3.5	——	——	——	——	——	——	——	——	——	——	——	——	——	——	14.7	1.7	0.609	0.055
L35_5	348	54	788	97	721	70	1.09293	0.038591	1216.5	3.08511	36.5	4.8	323	37	115	15	742	70	274	25	64.2	7.7	——	——	——	——	——	——	——	——	——	——	——	——	——	——	5.28	0.68	5.18	0.3
L35_6	210	29	870	110	612	69	1.42157	0.152768	1561.9	3.19365	89.9	9.3	558	63	122	13	792	99	221	26	44	4.7	——	——	——	——	——	——	——	——	——	——	——	——	——	——	5.55	0.72	4.72	0.32
L35_7	251	24	701	71	254	26	2.75984	0.440884	348.5	2.5422	33.6	5.3	134	15	25.9	4	155	20	36.1	6.9	13.5	1.9	——	——	——	——	——	——	——	——	——	——	——	——	——	——	4.6	0.87	16.9	1.1
L35_8	1880	170	578	72	2530	280	0.228458	-0.641193	2132	3.32879	232	20	990	140	150	16	760	71	400	39	25.1	3.2	——	——	——	——	——	——	——	——	——	——	——	——	——	——	26.4	2.5	16.47	0.85
L35_9	212	27	849	78	697	66	1.21808	0.0856749	702.2	2.84646	42.8	5.2	276	32	43.4	4.7	340	42	100	15	21.8	2.8	——	——	——	——	——	——	——	——	——	——	——	——	——	——	12.4	1.4	8.72	0.51
L35_10	242	28	475	51	283	29	1.67845	0.224907	228.9	2.35965	18.7	2.2	78.1	7.7	17.1	2	115	13	34.9	5	13.1	1.6	——	——	——	——	——	——	——	——	——	——	——	——	——	——	4.29	0.74	22.3	1.4
L35_11	663	81	5010	570	150	16	33.4	1.52375	2763	3.44138	540	52	1580	190	145	13	498	44	70.7	7.9	18.5	2.4	——	——	——	——	——	——	——	——	——	——	——	——	——	——	0.99	0.33	2.22	0.13
L35_12	257	32	386	42	495	44	0.779798	-0.108018	112.4	2.05077	4.9	1.1	30.9	4.5	9.3	1.2	67.3	7.4	35.7	6.8	9.2	1.5	——	——	——	——	——	——	——	——	——	——	——	——	——	——	8.5	1	43	2.1
L35_13	279	32	379	39	186	21	2.03763	0.309126	1066.2	3.02784	370	33	528	58	41.2	4.4	127	13	23.8	4.2	9.4	1.6	——	——	——	——	——	——	——	——	——	——	——	——	——	——	4.31	0.66	18.27	0.72
L35_14	292	35	499	53	991	90	0.503532	-0.297973	1048	3.02036	63.6	7.7	349	43	73.4	7.6	562	47	184	18	53.2	6	——	——	——	——	——	——	——	——	——	——	——	——	——	——	11.2	1.3	9.8	0.54
L35_15	366	47	783	66	1620	120	0.483333	-0.315753	633	2.8014	18.2	2.1	194	29	45.8	4.2	375	37	169	17	44.8	4.7	——	——	——	——	——	——	——	——	——	——	——	——	——	——	18.9	2.1	8.27	0.45
L35_16	1141	99	767	69	1780	140	0.430899	-0.365625	992.3	2.99664	91.9	7.8	425	42	65.4	6.5	410	34	146	15	19.2	2.5	——	——	——	——	——	——	——	——	——	——	——	——	——	——	16	1.8	2.89	0.13
L35_17	471	47	495	63	194	19	2.55155	0.406803	#VALUE!	#VALUE!	Below LOD	Below LOD	1.93	0.59	Below LOD	Below LOD	3.8	1.5	4.2	1.5	1.45	0.39	——	——	——	——	——	——	——	——	——	——	——	——	——	——	5.24	0.8	16.76	0.83
L35_18	506	45	407	38	795	66	0.51195	-0.290773	309.14	2.49016	5.04	0.99	60.8	8.4	22.3	2.6	221	26	121	13	25.7	2.7	——	——	——	——	——	——	——	——	——	——	——	——	——	——	9.5	1.2	14.03	0.61
L35_19	264	30	430	41	420	38	1.02381	0.0102192	924.4	2.96586	67.8	7.4	433	82	69.6	7.8	354	32	95	12	11.3	1.7	——	——	——	——	——	——	——	——	——	——	——	——	——	——	4.43	0.57	5.95	0.24
L35_20	542	70	458	40	107	9.9	4.28037	0.631482	#VALUE!	#VALUE!	Below LOD	Below LOD	Below LOD	Below LOD	Below LOD	Below LOD	1.3	0.75	Below LOD	Below LOD	0.29	0.19	——	——	——	——	——	——	——	——	——	——	——	——	——	——	2.41	0.45	1.091	0.054
L35_21	292	31	505	55	282	26	1.79078	0.253042	103.4	2.01452	7	1.5	35.4	4.8	8.3	1.4	52.7	8.4	25.9	5.1	10.9	1.4	——	——	——	——	——	——	——	——	——	——	——	——	——	——	2	0.35	2.16	0.14
L35_22	407	41	471	69	55.7	7.5	8.45601	0.927166	4.212	0.624488	0.032	0.064	1.44	0.56	0.34	0.17	2.4	1.1	1.39	0.88	0.64	0.31	——	——	——	——	——	——	——	——	——	——	——	——	——	——	1.59	0.29	5	0.26
L35_23	369	48	784	82	658	64	1.19149	0.0760902	1358.6	3.13309	94.6	9.5	500	46	106	11	658	56	177	19	29.9	3.5	——	——	——	——	——	——	——	——	——	——	——	——	——	——	5.28	0.93	11.41	0.68
L35_24	624	64	400	41	775	62	0.516129	-0.287242	523.4	2.71883	56.8	6.7	216	25	39.6	4.9	211	20	76	10	19.9	3	——	——	——	——	——	——	——	——	——	——	——	——	——	——	8.5	1.2	28.7	1.8
L35_25	474	41	416	48	658	70	0.632219	-0.199133	1631	3.21245	118	9.1	639	72	144	15	730	59	205	22	26.4	3.3	——	——	——	——	——	——	——	——	——	——	——	——	——	——	6.21	0.95	21.32	0.86
L35_26	525	60	464	57	1240	120	0.374194	-0.426904	3256	3.51268	217	24	1290	140	259	25	1490	140	373	35	75.3	7.8	——	——	——	——	——	——	——	——	——	——	——	——	——	——	11.5	1.3	14.22	0.7
L35_27	414	39	461	61	235	23	1.9617	0.292633	291.6	2.46479	29.6	3.5	121	12	23	3.2	118	13	36.3	6.3	8.5	1.1	——	——	——	——	——	——	——	——	——	——	——	——	——	——	4.38	0.72	14.68	0.69
L35_1_0	344	56	660	100	609	96	1.08374	0.0349266	606.2	2.78262	37.2	6	190	33	52	11	327	56	124	30	23.1	4.5	——	——	——	——	——	——	——	——	——	——	——	——	——	——	7.8	1.5	8.18	0.51
L35_1_1	880	120	660	110	1980	240	0.333333	-0.477121	279.9	2.447	46.9	5.6	112	20	24	5.3	97	15	61	11	17.9	3.7	——	——	——	——	——	——	——	——	——	——	——	——	——	——	38.8	5.7	0.785	0.059
L35_1_2	340	55	570	120	1520	220	0.375	-0.425969	2364	3.37365	187	35	990	160	187	30	1000	130	344	67	102	18	——	——	——	——	——	——	——	——	——	——	——	——	——	——	24.1	3.4	39.3	3.9
L35_1_3	271	51	710	110	338	43	2.10059	0.322342	2078	3.31765	192	26	870	170	166	26	850	120	198	33	36	6.7	——	——	——	——	——	——	——	——	——	——	——	——	——	——	3.97	0.94	11.89	0.86
L35_1_4	264	49	710	160	200	32	3.55	0.550228	1855	3.26834	286	36	970	240	111	17	488	76	76	13	16.8	3.3	——	——	——	——	——	——	——	——	——	——	——	——	——	——	1.8	0.46	15.5	1.2
L35_1_5	531	99	760	140	303	42	2.50825	0.399371	35.29	1.54765	2.29	0.91	12.4	3.6	3.1	1	17.5	5.5	17.2	5.9	7.2	2	——	——	——	——	——	——	——	——	——	——	——	——	——	——	4.6	1.1	1.16	0.11
L35_1_6	315	71	512	88	352	73	1.45455	0.162727	517	2.71349	71	10	264	72	29	5	153	24	54	12	32.6	7.8	——	——	——	——	——	——	——	——	——	——	——	——	——	——	3.98	0.97	18	1.5
L35_1_7	264	46	840	160	685	86	1.22628	0.0885887	3201	3.50529	301	44	1330	230	270	56	1300	170	420	80	65	10	——	——	——	——	——	——	——	——	——	——	——	——	——	——	6.3	1.2	10.58	0.85
L35_1_8	227	48	710	160	1150	160	0.617391	-0.209439	333.3	2.52284	17.5	3.6	122	29	22.8	3.9	171	25	115	21	35.5	7.8	——	——	——	——	——	——	——	——	——	——	——	——	——	——	18.4	3.1	6.28	0.65
L35_1_9	515	91	780	120	960	120	0.8125	-0.0901766	839.2	2.92387	41.2	8.9	262	42	80	17	456	79	243	42	36.3	6.1	——	——	——	——	——	——	——	——	——	——	——	——	——	——	14.2	2.5	13.5	1.2
L35_1_10	780	110	770	240	980	160	0.785714	-0.104735	279.9	2.447	38.2	5.3	125	24	20.7	4.1	96	14	54	11	18.4	3.7	——	——	——	——	——	——	——	——	——	——	——	——	——	——	15.1	2.8	0.804	0.08
L35_1_11	215	44	620	120	383	53	1.6188	0.209193	40.28	1.60509	4.3	1.4	15.2	3.4	2.48	0.69	18.3	4.9	17.5	5.1	5.6	1.8	——	——	——	——	——	——	——	——	——	——	——	——	——	——	9.1	1.6	14.5	1.1
L35_1_12	197	35	470	100	289	53	1.6263	0.2112	28.51	1.455	1.66	0.83	7.5	2.2	1.75	0.71	17.6	4.6	14.9	4.1	5.4	1.4	——	——	——	——	——	——	——	——	——	——	——	——	——	——	3.66	0.83	6.04	0.53
L35_1_13	298	60	467	83	582	91	0.802405	-0.0956061	1077	3.03222	95	17	560	160	71	14	351	52	124	25	32.3	5.9	——	——	——	——	——	——	——	——	——	——	——	——	——	——	6.8	1.4	11.9	1
L35_1_14	1030	200	501	96	1410	250	0.355319	-0.449381	803.1	2.90477	76	11	308	52	53.1	7.6	366	55	281	35	22.2	5.4	——	——	——	——	——	——	——	——	——	——	——	——	——	——	3.37	0.96	1.024	0.086
L35_1_15	298	52	870	150	220	35	3.95455	0.597097	1490	3.17319	229	44	710	160	99	21	452	72	112	17	23.4	4.3	——	——	——	——	——	——	——	——	——	——	——	——	——	——	1.72	0.47	7.6	0.61
L35_1_16	351	74	550	150	689	97	0.798258	-0.0978565	772.7	2.88801	43.7	5.7	294	78	68	10	367	62	170	31	26.7	5.4	——	——	——	——	——	——	——	——	——	——	——	——	——	——	11.6	2.8	11.3	1.1
L35_1_17	131	26	668	91	200	28	3.34	0.523746	254.3	2.40535	11.3	2.6	87	20	17	3.3	139	27	69	12	11.9	1.8	——	——	——	——	——	——	——	——	——	——	——	——	——	——	2.28	0.66	22.9	2.1
L35_1_18	322	80	355	84	402	66	0.883085	-0.0539977	354.3	2.54937	40.4	8.4	144	34	26.9	6.3	143	26	62	13	10	2.7	——	——	——	——	——	——	——	——	——	——	——	——	——	——	4.01	0.96	5.74	0.55
L35_1_19	326	60	403	89	1120	160	0.359821	-0.443913	587	2.76864	28.4	6.2	204	37	49.6	8.8	305	34	198	35	43.7	8.2	——	——	——	——	——	——	——	——	——	——	——	——	——	——	15.1	2.7	34	2.7
L35_1_20	370	64	500	120	378	52	1.32275	0.121478	56.5	1.75205	5.8	1.9	23	4.7	5.1	1.4	22.6	6.3	13	4.5	3.94	0.97	——	——	——	——	——	——	——	——	——	——	——	——	——	——	7.1	1.2	7.04	0.51
L35_1_21	261	44	850	180	72	19	11.8056	1.07209	27.4	1.43775	2.2	1	10.5	2.7	3	0.99	11.7	3.2	6.8	3.5	1.99	0.84	——	——	——	——	——	——	——	——	——	——	——	——	——	——	1.53	0.5	4.35	0.37
L35_1_22	299	54	590	120	640	110	0.921875	-0.035328	512	2.70927	19.9	4.1	142	22	47.1	9.6	303	43	172	34	27.2	4.2	——	——	——	——	——	——	——	——	——	——	——	——	——	——	10.1	1.7	11.5	1.3
L35_1_23	1130	140	850	140	1430	160	0.594406	-0.225917	505.1	2.70338	54.4	8.1	256	73	31.7	6.8	163	23	132	15	27.3	5.1	——	——	——	——	——	——	——	——	——	——	——	——	——	——	22.1	3.4	4.37	0.3
L35_1_24	333	63	1950	380	530	71	3.67925	0.565759	2839	3.45317	231	34	1310	270	238	42	1060	150	322	48	98	16	——	——	——	——	——	——	——	——	——	——	——	——	——	——	4.8	1.1	20.8	1.6
L35_1_25	221	39	1090	280	643	81	1.69518	0.229216	613.7	2.78796	21.7	4.2	197	36	61	10	334	54	168	24	30.8	6.1	——	——	——	——	——	——	——	——	——	——	——	——	——	——	10.3	1.6	23.9	2.2
L35_1_26	312	47	540	120	2250	280	0.24	-0.619789	115.1	2.06108	7.4	2.3	32.3	7.1	8.4	1.6	67	14	84	13	27.4	5.5	——	——	——	——	——	——	——	——	——	——	——	——	——	——	31.9	3.9	19.8	1.6
L35_1_27	338	82	503	99	478	54	1.0523	0.0221401	522.5	2.71809	50.8	8.1	250	52	36.7	6.8	185	38	97	20	22.9	3.5	——	——	——	——	——	——	——	——	——	——	——	——	——	——	5.4	1	8.98	0.87
L35_1_28	273	60	518	64	750	100	0.690667	-0.160732	1394	3.14426	154	27	670	150	98	17	472	70	189	35	52.8	9.1	——	——	——	——	——	——	——	——	——	——	——	——	——	——	9.2	1.6	19.5	1.7
L35_1_29	310	56	1000	170	721	94	1.38696	0.142065	3028	3.48116	374	52	1490	290	234	41	930	110	379	64	65	9.1	——	——	——	——	——	——	——	——	——	——	——	——	——	——	6.2	1.2	5.79	0.43
L35_1_30	432	73	720	130	1240	240	0.580645	-0.236089	513.9	2.71088	44.7	7.5	188	33	36.2	6.2	245	53	135	21	49	7.7	——	——	——	——	——	——	——	——	——	——	——	——	——	——	14.8	2.5	23.6	1.8
L35_1_31	610	120	650	130	1520	290	0.427632	-0.36893	833.1	2.9207	69	10	359	61	60.1	9.8	345	45	172	23	32.5	6.8	——	——	——	——	——	——	——	——	——	——	——	——	——	——	16.4	2.7	10.48	0.82
L35_2_0	760	130	520	110	870	190	0.597701	-0.223516	223.1	2.3485	22.7	5.2	75	23	16.4	4.9	109	24	38	13	14.6	4.1	——	——	——	——	——	——	——	——	——	——	——	——	——	——	6.5	1.7	2.94	0.35
L35_2_1	660	120	492	93	530	76	0.928302	-0.0323108	300.2	2.47741	28.5	7.1	87	20	24.7	7.2	160	44	77	23	11.8	3.8	——	——	——	——	——	——	——	——	——	——	——	——	——	——	5.5	1.6	3.62	0.41
L35_2_2	349	77	410	80	790	130	0.518987	-0.284843	1458	3.16376	153	39	630	180	105	24	570	110	175	42	32.7	6.9	——	——	——	——	——	——	——	——	——	——	——	——	——	——	7.6	2.3	37	4.7
L35_2_3	360	110	400	140	580	100	0.689655	-0.161368	582	2.76492	61	12	226	42	44	10	251	48	96	24	69	21	——	——	——	——	——	——	——	——	——	——	——	——	——	——	3.37	0.93	5.16	0.5
L35_2_4	306	55	570	180	378	69	1.50794	0.178383	159.8	2.20358	10.3	3.5	69	24	9.5	2.2	71	21	43	15	8.3	2.6	——	——	——	——	——	——	——	——	——	——	——	——	——	——	5.2	1.3	15.6	1.6
L35_2_5	370	92	478	93	1460	280	0.327397	-0.484925	638	2.80482	19.5	5.5	121	25	47.5	9.8	450	130	173	37	32.2	8.9	——	——	——	——	——	——	——	——	——	——	——	——	——	——	19	3.4	15.7	1.6
L35_2_6	318	69	650	200	660	160	0.984848	-0.00663058	1832	3.26293	218	29	700	130	154	26	760	120	204	45	161	28	——	——	——	——	——	——	——	——	——	——	——	——	——	——	4.1	1.2	11.8	1.1
L35_2_7	247	41	256	47	313	68	0.817891	-0.0873044	981	2.99167	145	29	472	94	78	16	286	54	74	22	9.9	2.4	——	——	——	——	——	——	——	——	——	——	——	——	——	——	1.99	0.78	11.7	1
L35_2_8	860	110	720	120	1910	290	0.376963	-0.423701	683	2.83442	62	13	215	36	60	12	346	75	197	46	31.8	9.5	——	——	——	——	——	——	——	——	——	——	——	——	——	——	19.4	3.3	4.75	0.5
L35_2_9	265	47	670	120	616	83	1.08766	0.0364941	433.8	2.63729	13	3.7	106	21	40.8	5.3	274	34	134	23	27	6.6	——	——	——	——	——	——	——	——	——	——	——	——	——	——	6.8	1.3	4.24	0.27
L35_2_10	162	24	452	65	495	66	0.913131	-0.0394668	525.6	2.72066	26.8	5.2	198	36	41.8	4.7	259	35	92	16	26.6	3.6	——	——	——	——	——	——	——	——	——	——	——	——	——	——	6.5	1.2	14.04	0.86
L35_2_11	850	130	780	160	1270	160	0.614173	-0.211709	769	2.88593	105	16	282	36	54	8.3	328	51	96	15	20.3	4.9	——	——	——	——	——	——	——	——	——	——	——	——	——	——	19.3	3	0.923	0.071
L35_2_12	259	37	448	84	360	52	1.24444	0.0949755	1801	3.25551	183	29	730	120	126	15	762	95	142	26	16.5	4.2	——	——	——	——	——	——	——	——	——	——	——	——	——	——	3.73	0.83	7.86	0.57
L35_2_13	329	56	494	84	189	31	2.61376	0.417265	146.7	2.16643	15.9	3.3	53.7	9.7	10.1	2.4	67	14	39	10	6.8	2.1	——	——	——	——	——	——	——	——	——	——	——	——	——	——	3.9	1.2	7.4	1.6
L35_2_14	390	63	690	120	650	120	1.06154	0.0259357	307.6	2.48799	38.8	8.7	134	20	25.8	4.7	109	19	34.6	9	13.4	3.1	——	——	——	——	——	——	——	——	——	——	——	——	——	——	6.9	1.7	8.91	0.71
L35_2_15	224	49	312	48	264	54	1.18182	0.0725507	156	2.19312	20.8	4.9	52	11	9.2	1.9	74	15	26.3	9.4	63	14	——	——	——	——	——	——	——	——	——	——	——	——	——	——	2.36	0.75	4.08	0.48
L35_2_16	238	48	430	100	1330	230	0.323308	-0.490383	977	2.98989	58	12	291	61	78	13	550	130	214	44	80	20	——	——	——	——	——	——	——	——	——	——	——	——	——	——	17.8	4	9.2	1.2
L35_2_17	1320	200	770	150	1500	320	0.513333	-0.289601	565.1	2.75213	66	13	212	43	39.1	8.9	248	50	110	27	23.1	5.7	——	——	——	——	——	——	——	——	——	——	——	——	——	——	24	5	0.729	0.086
L35_2_18	241	40	640	150	249	58	2.57028	0.409981	187.3	2.27254	19.5	5.5	73	20	11.8	2.7	83	17	37	12	25.1	7.4	——	——	——	——	——	——	——	——	——	——	——	——	——	——	3.67	0.93	3.6	0.38
L35_2_19	267	44	960	170	970	130	0.989691	-0.0045005	1315	3.11893	88	15	526	85	99	14	602	99	233	39	39.1	6.5	——	——	——	——	——	——	——	——	——	——	——	——	——	——	13.7	2.7	13.9	1.2
L35_2_20	402	77	780	170	870	140	0.896552	-0.0474246	1139	3.05652	70	13	424	97	110	19	535	71	220	33	56.3	9.6	——	——	——	——	——	——	——	——	——	——	——	——	——	——	9	1.9	7.32	0.79
L35_2_21	517	99	830	130	417	73	1.99041	0.298942	140.4	2.14737	10.1	3	49	10	9.3	2.8	72	14	43	17	13.3	3.6	——	——	——	——	——	——	——	——	——	——	——	——	——	——	3.6	1.1	5.05	0.56
L35_2_22	350	100	480	100	264	37	1.81818	0.259637	24.47	1.38863	0.82	0.65	7.6	2.1	1.15	0.57	14.9	5.1	8.2	3.9	1.47	0.74	——	——	——	——	——	——	——	——	——	——	——	——	——	——	4.3	1.3	8	0.69
L35_2_23	655	77	346	34	1380	120	0.250725	-0.600803	1105.7	3.04364	85	14	366	44	67.7	8.1	587	73	217	35	205	31	——	——	——	——	——	——	——	——	——	——	——	——	——	——	10.6	2	20	1.3
L35_2_24	890	110	342	46	1030	100	0.332039	-0.478811	497.5	2.69679	49.2	8.3	199	30	30.3	5.8	219	31	86	16	15.8	3.3	——	——	——	——	——	——	——	——	——	——	——	——	——	——	13.9	2.2	7.86	0.52
L35_2_25	307	56	616	73	871	94	0.707233	-0.150437	70.1	1.84572	2.6	1.4	16.9	3.3	5.6	1.4	45	10	38	10	8.2	2.4	——	——	——	——	——	——	——	——	——	——	——	——	——	——	21	3.1	10.46	0.52
L35_2_26	327	57	635	71	594	62	1.06902	0.0289873	822	2.91487	92	12	317	36	54	6.8	359	35	116	20	26.5	3.7	——	——	——	——	——	——	——	——	——	——	——	——	——	——	6.1	1.7	19.04	0.83
L35_2_27	366	49	615	70	758	85	0.811346	-0.0907941	1837	3.26411	114	15	731	77	141	15	851	94	206	30	37.4	5.3	——	——	——	——	——	——	——	——	——	——	——	——	——	——	12.7	2.5	23.6	1.4
L35_2_28	329	62	385	63	499	71	0.771543	-0.11264	235.4	2.37181	25.2	5.5	92	15	15.2	2.6	103	18	44	16	16.7	4.4	——	——	——	——	——	——	——	——	——	——	——	——	——	——	5.8	1.4	14.9	1
L35_2_29	249	47	560	100	72	12	7.77778	0.890856	28.81	1.45954	0.33	0.46	10.9	3.3	0.98	0.55	16.6	5.9	6.7	3.4	2.2	1.2	——	——	——	——	——	——	——	——	——	——	——	——	——	——	1.55	0.68	4.24	0.24
L35_2_30	563	71	604	75	1100	110	0.549091	-0.260356	926.6	2.96689	64.9	7.3	309	44	54.7	7.1	498	54	170	21	28.4	5.5	——	——	——	——	——	——	——	——	——	——	——	——	——	——	11.7	2.4	5.93	0.43
L35_2_31	350	58	573	89	459	55	1.24837	0.0963419	49.24	1.69232	4.3	1.7	11.3	2.8	2.54	0.96	31.1	7.5	15.1	5.2	6.9	2.2	——	——	——	——	——	——	——	——	——	——	——	——	——	——	8.7	2.3	12.98	0.77
L35_2_32	950	140	732	75	1090	170	0.67156	-0.172915	2291	3.36003	261	33	940	120	165	19	925	97	301	36	35.4	6.7	——	——	——	——	——	——	——	——	——	——	——	——	——	——	9.9	2.3	5.22	0.35
L35_2_33	548	74	940	160	820	140	1.14634	0.059314	1986	3.29798	282	55	880	160	124	18	700	120	170	28	61	10	——	——	——	——	——	——	——	——	——	——	——	——	——	——	8	1.7	10.9	1.7
L35_2_34	880	120	645	73	1520	190	0.424342	-0.372284	208.8	2.31973	23.6	6.4	71.2	9.8	14	2.6	100	16	74	19	29.1	4.9	——	——	——	——	——	——	——	——	——	——	——	——	——	——	25.3	4.4	5.55	0.45
L35_2_35	217	48	860	120	135	21	6.37037	0.804165	104.1	2.01745	6.6	2.3	33	7.4	8.5	2.4	56	13	23.2	8.4	3.6	1.7	——	——	——	——	——	——	——	——	——	——	——	——	——	——	2.13	0.89	2.75	0.19
L35_2_36	387	62	860	110	587	58	1.46508	0.16586	2563	3.40875	230	30	1020	120	183	20	1130	150	267	32	37.2	4.8	——	——	——	——	——	——	——	——	——	——	——	——	——	——	9.1	1.6	8.53	0.57
L35_2_37	1770	220	273	46	2870	310	0.095122	-1.02172	720.3	2.85751	56	9.1	224	27	46.3	6.1	394	56	366	55	35.2	6.1	——	——	——	——	——	——	——	——	——	——	——	——	——	——	15.8	2.8	3.25	0.27
L35_2_38	252	52	461	80	300	53	1.53667	0.18658	107.7	2.03222	4.9	1.5	34.2	6.9	8.6	2.3	60	15	26.7	9.4	9.1	3.2	——	——	——	——	——	——	——	——	——	——	——	——	——	——	6.7	1.7	22.4	1.6
L35_2_39	390	54	610	120	707	95	0.862801	-0.0640896	748.1	2.87396	57	11	237	39	49.1	8.5	405	47	155	27	36.8	4.6	——	——	——	——	——	——	——	——	——	——	——	——	——	——	10.1	2.2	13	1
L35_2_40	185	32	550	130	310	39	1.77419	0.249001	902.6	2.9555	25.6	5.5	274	41	78	11	525	70	194	33	23.4	3.9	——	——	——	——	——	——	——	——	——	——	——	——	——	——	6	1.5	6.68	0.51
L35_2_41	319	56	488	59	1510	260	0.323179	-0.490557	459.1	2.66191	17.8	3.8	136	23	31.3	5.3	274	37	163	26	23.3	4.4	——	——	——	——	——	——	——	——	——	——	——	——	——	——	15.7	2.6	33.9	2
L35_2_42	245	51	622	57	199	27	3.12563	0.494937	14.33	1.15625	0.22	0.44	1.4	1	0.91	0.59	11.8	6.4	9.4	5.4	0.34	0.48	——	——	——	——	——	——	——	——	——	——	——	——	——	——	4.3	1.4	3.81	0.24
L35_2_43	470	62	598	75	1020	140	0.586275	-0.231899	459	2.66181	42.1	7.8	139	15	30.9	4.3	247	31	122	26	26.1	4.2	——	——	——	——	——	——	——	——	——	——	——	——	——	——	14.8	2.5	7.7	0.59
L35_2_44	229	33	594	65	378	42	1.57143	0.196295	1376	3.13862	123	12	507	51	95	13	651	62	197	33	40.7	7.3	——	——	——	——	——	——	——	——	——	——	——	——	——	——	5.4	1.3	4.83	0.32
L35_2_45	587	82	3670	330	101	14	36.3366	1.56034	1229.5	3.08973	196	23	569	48	81.5	8.7	383	50	58	13	12.6	2.9	——	——	——	——	——	——	——	——	——	——	——	——	——	——	0.89	0.47	0.746	0.061
L5_0	344	36	342	60	263	33	1.30038	0.11407	2388	3.37803	273	45	980	130	175	25	960	110	202	18	12	1.2	130	15	13.7	1.4	63.6	7.3	9.7	1.1	22.1	2.3	2.99	0.54	15.9	2.9	2.52	0.49	22.6	1.3
L5_1	364	39	309	67	218	24	1.41743	0.151502	2668	3.42619	454	85	1220	180	144	17	850	100	149	14	9.9	1.2	97	12	9.4	1.2	50.1	6.8	7.73	0.92	18.5	2.3	2.41	0.49	12.7	2.3	1.83	0.38	12.41	0.82
L5_2	265	28	253	30	243	27	1.04115	0.0175142	2140	3.33041	183	36	1050	220	163	22	744	85	162	15	11.6	1.2	111	12	12.9	1.8	63.2	8.2	9.7	1.4	23.3	3.3	2.66	0.48	16.2	2.9	2.22	0.4	18	1.2
L5_3	382	32	396	70	277	30	1.4296	0.155215	3314	3.52035	424	95	1600	230	217	34	1073	91	208	18	11.7	1.4	129	16	14.4	1.6	69.1	6.9	10.2	1.2	24	3.1	3.19	0.53	16.7	2.7	2.36	0.39	17.94	0.95
L5_4	358	41	319	48	245	27	1.30204	0.114625	5046	3.70295	910	170	2480	370	316	60	1340	190	202	16	11.2	1	127	12	11.9	1.4	60.4	6.8	9.6	1.1	22	3	3.02	0.46	15.6	2.7	2.05	0.45	14.39	0.73
L5_5	324	34	349	71	231	25	1.51082	0.179213	5179	3.71425	860	110	2680	500	289	43	1350	140	229	21	13.7	1.8	145	17	12.8	1.5	58.5	7	8.1	1.1	22.6	2.7	2.38	0.29	14.2	2.7	2.11	0.49	21.1	1.5
L5_6	275	23	340	49	262	20	1.29771	0.113178	1894	3.27738	169	20	810	110	146	18	769	60	166	12	10.98	0.85	123	10	12.3	1.2	62.7	6.7	10	1.3	25.3	3	2.65	0.41	14.7	2.4	1.96	0.37	17.79	0.95
L5_7	337	23	345	39	298	36	1.15772	0.0636028	3121	3.49429	433	42	1510	180	214	26	964	84	178	12	10.65	0.94	122	11	12.8	1.3	65.2	7.8	10.6	1.3	25.8	3.3	3	0.47	15.7	2.2	2.08	0.34	15.05	0.67
L5_8	344	31	326	40	268	21	1.21642	0.0850828	3308	3.51957	540	110	1540	300	228	37	1000	100	200	17	11.4	1.1	125	11	13.5	1.3	62.4	5.9	10.5	1.2	25.4	3	3.41	0.51	18.4	2.6	2.49	0.41	19.14	0.91
L5_9	394	60	374	57	305	35	1.22623	0.0885718	2190	3.34044	175	20	909	94	176	22	930	88	181	14	12.4	1.3	131	16	13.8	1.6	62.5	5.8	10.5	1.3	27.9	3.8	3.22	0.61	18.4	2.6	2.89	0.5	16.53	0.84
L5_10	280	27	320	46	252	28	1.26984	0.103749	3390	3.5302	381	77	1680	300	199	29	1130	120	223	25	13.1	1.1	144	14	13.1	1.2	58.5	5.9	10.5	1	24.1	3	2.8	0.52	15	2.5	2.32	0.41	21.18	0.93
L5_11	303	29	325	46	167	15	1.94611	0.289167	2148	3.33203	140	18	840	130	184	27	984	90	265	20	13.1	1.3	168	17	12.8	1.3	53.2	4.8	7	0.86	14.5	2.1	1.38	0.34	7.4	1.4	0.9	0.22	14.11	0.78
L5_12	243	23	306	54	240	20	1.275	0.10551	3842	3.58456	562	94	1780	290	250	31	1250	140	195	17	11.3	1.1	125	13	14.4	1.7	65.4	8.2	10.2	1.1	26.7	3.9	2.83	0.56	16.5	2.9	2.84	0.48	17.4	1.2
L5_13	362	34	371	58	249	25	1.48996	0.173175	4851	3.68583	640	100	2210	340	341	37	1660	170	342	24	15.2	1.6	192	23	17	1.7	68.3	5.5	10.5	1	20.2	2.8	2.16	0.47	9.7	1.9	1.23	0.31	17.22	0.99
L5_14	242	26	281	34	286	31	0.982517	-0.00765971	3862	3.58681	660	140	1850	390	232	38	1120	170	232	24	11.3	1.3	153	17	17.2	2.2	79.2	8.6	11.3	1.2	27.7	3.3	3.65	0.54	14.5	2.3	2.53	0.47	17.69	0.93
L5_15	276	28	354	50	268	28	1.3209	0.120868	5971	3.77605	1090	190	3010	420	381	59	1490	150	225	18	14.1	1.5	152	17	14	1.7	65.7	7.3	10.5	1.6	24.8	3.4	3.03	0.45	20.6	3	2.37	0.55	15.78	0.88
L5_16	359	31	337	57	314	26	1.07325	0.0307003	2206	3.34361	212	27	950	130	190	24	854	71	203	15	10.93	0.89	144	14	14.7	1.4	74.9	7.6	13.7	1.7	29.3	3.8	3.25	0.58	18	2.8	2.04	0.39	17.7	0.88
L5_17	265	21	330	38	195	17	1.69231	0.228479	5876	3.76908	990	140	2920	380	366	44	1600	140	281	21	15.4	1.1	159	16	11.7	1.1	49.5	5	7.7	1.1	17.7	2.3	2.16	0.39	9.7	1.6	1.34	0.26	18.25	0.74
L5_18	257	17	316	42	236	17	1.33898	0.126775	3383	3.5293	532	97	1680	330	202	28	969	96	191	15	12.1	1.1	144	13	12.1	1.2	60.4	5.4	10.8	1.3	24.5	2.7	2.79	0.41	15.5	3.2	2.21	0.38	21.5	1.1
L5_19	295	24	316	37	270	20	1.17037	0.0683233	1752	3.24353	150	17	749	90	143	15	710	57	153.9	9	11.2	1.1	109	10	11.6	1	62.6	5.1	10.3	1.1	25.7	2.7	3.25	0.45	19.2	2.9	2.89	0.45	16.36	0.68
L5_20	262	15	303	28	264	20	1.14773	0.0598387	6007	3.77866	1290	250	2770	430	387	48	1560	170	219	15	14.28	0.98	141	10	12.5	1.1	63.4	6.1	9.3	1	23	2.4	2.69	0.37	16.8	2.4	2.49	0.34	15.66	0.75
L5_21	430	38	349	45	296	26	1.17905	0.0715337	3366	3.52711	500	130	1460	230	226	33	1180	150	204	16	14.5	1.2	158	15	15.2	1.4	67.3	4.9	13.4	1.2	30.7	3.5	3.34	0.47	19.8	2.2	2.86	0.41	16.85	0.77
L5_22	275	28	332	36	301	25	1.10299	0.0425716	2050	3.31175	164	22	890	130	169	24	827	52	182	11	13.09	0.84	143	12	13.6	1.1	72.6	5.3	12.1	1	27.3	2.8	3.19	0.5	20.6	2.5	2.99	0.48	22.15	0.92
L5_23	317	25	266	40	104	12	2.55769	0.407848	4390	3.64246	650	170	2410	680	250	52	1080	160	180	17	12.2	1.2	101	10	6.64	0.82	28.4	3.6	3.7	0.47	8.4	1.2	0.87	0.2	4.46	0.92	0.74	0.19	16.78	0.91
L5_24	317	34	284	34	269	22	1.05576	0.0235661	2406	3.3813	267	38	1070	150	175	23	894	78	166.2	9.6	11.09	0.79	116	10	10.9	1.1	62.1	5.2	9.75	0.85	21.9	2.5	2.8	0.37	19	2.2	3.12	0.46	20.55	0.95
L5_25	285	32	302	51	291	29	1.0378	0.016114	2212	3.34479	201	23	970	120	170	28	871	83	187	16	11.8	1.1	145	14	14.9	1.6	76.1	7.6	13	1.7	25.5	3.2	2.28	0.4	17.6	2.7	2.26	0.43	16.9	0.99
L6_0	164	28	208	32	35.3	4.8	5.89235	0.770289	1032	3.01368	225	27	569	90	56	10	182	19	28.3	4.2	6.02	0.91	23.1	4.3	2.47	0.53	10.7	2.2	1.54	0.36	2.55	0.78	0.31	0.13	0.79	0.51	0.088	0.069	13.68	0.94
L6_1	123	15	213	44	55	6.9	3.87273	0.588017	1696.5	3.22955	457	50	880	110	68.5	8.7	291	29	40.1	3.8	8.9	1.1	31.9	5.6	3.36	0.58	16.7	2.7	2.25	0.45	4.6	1.1	0.43	0.19	1.32	0.69	0.21	0.12	45.9	2.8
L6_2	111	15	144	22	33.7	5.5	4.273	0.630733	708.8	2.85052	190	28	363	74	31.8	5	124	16	25	4.1	6.41	0.96	22.2	3.8	1.78	0.37	10.2	2.3	1.26	0.34	2.29	0.76	0.143	0.098	0.48	0.38	0.039	0.044	19.3	1.5
L6_3	92	17	198	27	35.5	5	5.57746	0.746437	1261.9	3.10102	340	40	655	97	53.9	7.4	213	20	27.4	3.4	7.8	1.2	20.6	3.8	2.5	0.54	12.4	2.7	1.47	0.29	2.14	0.77	0.023	0.047	0.42	0.37	0	1	57.7	3.8
L6_4	146	20	171	25	60.8	9.6	2.8125	0.449093	1117	3.04805	283	50	536	96	59	11	239	32	34.4	4.4	6.6	0.78	29.4	4.6	2.94	0.52	17.5	2.9	2.16	0.5	5.1	1.2	0.45	0.18	1.74	0.85	0.29	0.19	16.9	1
L6_5	102	12	248	42	39.8	5.3	6.23116	0.794569	986.8	2.99423	200	29	504	70	50.8	7.3	232	20	36.2	4.2	8.19	0.98	35	5.7	3.03	0.61	14.2	2.6	1.85	0.44	3.01	0.88	0.16	0.11	0.4	0.35	0	1	21	1.3
L6_6	109	15	216	44	42.5	6.6	5.08235	0.706065	1460	3.16435	330	44	750	110	72	13	308	37	44.9	5.1	9.2	1.2	35.4	5.5	2.9	0.55	14	2.3	1.43	0.41	3	1	0.15	0.11	0.58	0.48	0.073	0.074	30.1	2.1
L6_7	196	29	182	28	47.7	6.7	3.81551	0.581553	1128	3.05231	247	32	602	85	60	9.6	219	23	34.5	5.3	7.1	1.1	25	4.3	2.9	0.47	15.7	2.9	1.78	0.43	3.6	1.1	0.19	0.12	1.28	0.67	0	1	21.1	1.3
L6_8	107	18	179	31	44.3	6	4.04063	0.606449	994.5	2.9976	260	38	502	79	47.5	9.4	185	20	25.4	3.3	7.8	1.1	22.4	4.2	2.46	0.58	11.8	2.4	1.49	0.42	3.07	0.62	0.107	0.084	1.1	0.65	0.013	0.026	19.7	1.4
L6_9	150	19	184	32	25.4	4.3	7.24409	0.859984	1536	3.18639	415	60	750	150	81	14	290	33	39.5	5.7	7.8	1.2	25.4	4.7	2.26	0.52	10.1	2.4	1.09	0.28	2.16	0.72	0.36	0.16	1.17	0.63	0.01	0.021	39.2	2.3
L6_10	92	15	202	42	32.1	4.4	6.29283	0.798846	810.5	2.90875	252	39	401	83	24.5	3.7	133	16	19.6	2.1	5.82	0.9	17.6	3.6	1.82	0.45	10	2.4	1.15	0.31	1.78	0.63	0.063	0.062	0.59	0.4	0.087	0.076	14.02	0.94
L6_11	141	24	144	24	38.9	6.5	3.7018	0.568413	968	2.98588	185	35	485	72	63	12	235	25	39.6	5.4	7.3	1.1	23.8	5.2	2.84	0.59	13.9	2.8	1.44	0.37	2.13	0.8	0.18	0.14	0.81	0.5	0.045	0.052	14.98	0.96
L6_12	147	19	222	31	44.9	5.7	4.94432	0.694107	1971	3.29469	570	75	920	130	97	13	384	43	42.8	4.6	8.5	1.1	27.5	4.2	2.61	0.52	14.1	2.2	1.61	0.4	4.1	1.2	0.24	0.12	1.75	0.83	0.19	0.11	28.9	1.7
L6_13	129	15	198	27	44.9	5.6	4.4098	0.644419	2165	3.33546	470	50	1210	160	90	11	395	47	61.3	6.2	7.96	0.84	42.2	5.9	4.07	0.63	14.2	2.3	1.72	0.48	2.87	0.73	0.26	0.14	0.73	0.5	0.101	0.081	29.8	1.7
L6_14	102	13	149	21	48.1	6	3.09771	0.491041	945	2.97543	271	30	456	55	43	4.7	175	17	31.3	3.7	7.02	0.7	27.6	4.6	2.09	0.37	12.9	2.4	1.8	0.32	3.08	0.88	0.2	0.11	1.09	0.53	0.032	0.044	15.36	0.87
L6_15	104	11	256	34	52.4	6	4.8855	0.688909	1653	3.21827	522	60	775	77	84	11	272	21	43.9	4.2	7.5	0.93	33.3	4.9	3.6	0.56	14.6	2.4	2.01	0.36	3.18	0.88	0.32	0.13	1.32	0.67	0.19	0.11	34.7	1.4
L6_16	122	15	224	32	32.9	5.8	6.80851	0.833052	1649	3.21722	524	96	790	100	82	13	253	20	39.7	3.9	8.2	1	28.8	3.8	2.12	0.42	9.6	1.7	1.14	0.34	2.16	0.7	0.093	0.076	0.42	0.33	0	1	40.4	1.9
L6_17	120	16	218	31	38.9	5	5.60411	0.748507	1934	3.28646	511	66	920	110	107	14	396	37	57.2	6.7	10.2	1.1	35.4	5.6	3.25	0.45	13.2	2.1	1.59	0.41	2.1	0.74	0.31	0.14	1.28	0.6	0.067	0.066	49.8	3
L6_18	177	20	239	45	59.7	6.6	4.00335	0.602424	4519	3.65504	1280	160	2300	320	208	32	731	75	87.3	7.8	11.1	1.3	56.3	8.1	4.34	0.77	20.4	3.6	2.68	0.57	5.5	1.2	0.48	0.24	1.38	0.69	0	1	28.7	1.7
L6_19	151	21	193	25	21.5	3.4	8.97674	0.953119	1601	3.20439	452	64	830	110	70	13	249	25	33.1	4	7.15	0.93	27	4.7	1.6	0.36	6.8	1.2	0.98	0.27	1.23	0.5	0.013	0.027	0.2	0.23	0	1	29.1	1.6
L6_20	170	28	267	49	48.4	7.4	5.51653	0.741666	1593	3.20222	383	48	780	110	86	11	344	44	45	4.9	8.9	1	32.4	5.2	3.37	0.71	11.6	2.4	1.91	0.46	4.1	1.1	0.25	0.12	0.62	0.45	0.095	0.083	22	1.3
L6_21	97	14	221	30	52.4	8	4.21756	0.625061	1761	3.24576	468	65	960	160	75	10	258	23	39.3	5.4	8.21	0.88	31	4.8	2.59	0.47	12.2	2.3	1.46	0.37	3.9	1	0.28	0.14	0.97	0.7	0.16	0.11	39.6	2.2
L6_22	174	23	226	35	25.2	4.2	8.96825	0.952708	1972	3.29491	503	66	1040	130	93	13	336	36	44.5	4.6	8.61	0.9	21	3.5	1.76	0.42	8	2	0.94	0.29	1.55	0.6	0.14	0.11	0.44	0.38	0	1	36.2	2.3
L6_23	134	17	198	32	45.9	7.4	4.31373	0.634853	786.7	2.89581	212	39	398	70	31.7	4.6	145	16	26.6	3.5	7.6	1.2	21.6	3.8	2.2	0.46	13	2.6	1.6	0.42	1.9	0.62	0.23	0.14	0.75	0.51	0.058	0.068	13.9	0.85
L6_24	155	24	245	35	35.5	5.8	6.90141	0.838938	1613	3.20763	486	77	790	110	78	11	259	22	36.1	4.7	7.2	1	20.9	4.4	2.25	0.48	8.5	1.8	1.14	0.3	1.51	0.66	0.108	0.094	1.07	0.56	0.014	0.027	43.1	2.8
L6_25	98	17	173	23	42.6	6.8	4.06103	0.608637	808.6	2.90773	216	24	425	65	32.6	6.6	135	14	25.6	2.9	7.6	1	24.4	5.1	2.55	0.5	13.6	2.3	1.83	0.45	2.05	0.67	0.15	0.1	0.28	0.28	0	1	17.79	0.86
L6_26	96	15	227	38	56.2	7.1	4.03915	0.60629	1127.5	3.05212	292	38	574	63	55.5	8.4	206	18	33.1	3.9	5.25	0.7	25.5	3.8	2.48	0.51	13.5	2.2	2.05	0.46	3.7	1	0.22	0.15	0.98	0.59	0.17	0.11	21.99	0.95
L6_27	75.6	9.5	185	27	36.7	4.9	5.04087	0.702506	826.1	2.91703	232	29	387	52	40.1	6.7	167	15	26.4	3.2	6.2	0.84	23.1	3.8	2.39	0.5	10.4	1.6	1.58	0.36	2.39	0.77	0.158	0.094	0.72	0.45	0.045	0.052	14.6	0.88
L21_0	183	15	300	39	188	19	1.59574	0.202963	2125	3.32736	288	33	1100	250	160	22	577	47	96.2	9	9.7	1	80.6	6.9	7.98	0.83	40.2	4.4	5.93	0.72	15.7	1.8	1.72	0.31	10.2	1.7	1.8	0.31	3.79	0.28
L21_1	143	19	256	30	266	27	0.962406	-0.0166417	2933	3.46731	453	55	1530	270	177	23	773	62	127.2	8.9	12.8	1.5	114	13	11.1	1.3	58.2	5.3	8.71	0.96	22.7	2.3	2.37	0.41	13.6	2.1	2.38	0.41	6.52	0.43
L21_2	201	29	340	110	239	36	1.42259	0.153081	2335	3.36829	420	70	1190	230	172	35	553	76	79.1	8.2	8.1	1.1	77	12	8.2	1.1	46.4	6.1	8.2	1.2	19.3	2.8	1.96	0.37	9.3	1.8	1.4	0.33	6.91	0.51
L21_3	174	16	228	23	254	24	0.897638	-0.0468989	1811	3.25792	233	29	830	100	135	19	613	61	103	8.7	9.9	1	99	11	10.5	1.1	50.6	4.9	9.8	1.2	23	2.5	3.17	0.55	16.8	2.7	1.99	0.32	3.98	0.22
L21_4	235	40	304	62	235	29	1.29362	0.111806	4995	3.69854	1210	310	2490	420	255	35	1040	160	116	11	11.3	1.4	87	10	9.9	1.3	52.1	7	8.6	1.1	20.2	3.1	2.64	0.39	15	2.9	1.77	0.39	5.67	0.4
L21_5	152	18	241	38	135	15	1.78519	0.251683	2670	3.42651	399	56	1230	170	202	36	839	82	135	14	9.17	0.88	109	13	8.4	1.1	40.3	4.4	4.65	0.61	9.1	1.6	0.79	0.21	4.3	1.2	0.47	0.14	7.94	0.52
L21_6	155	25	242	38	61	10	3.96721	0.598486	3166	3.50051	660	110	1780	350	177	40	549	55	75.8	9	11.7	1.3	49.3	7.6	3.12	0.45	14.7	2.3	2.37	0.43	6.2	1.3	0.72	0.26	2.16	0.74	0.48	0.16	8.14	0.56
L21_7	196	29	260	50	65.8	6.6	3.95137	0.596747	3024	3.48058	533	61	1570	300	181	31	740	100	97	10	11	1.4	67.4	9.1	5.38	0.83	20.5	2.8	2.46	0.45	4.7	1	0.49	0.17	1.76	0.73	0.104	0.069	11.65	0.88
L21_8	211	25	241	38	76.4	9.8	3.15445	0.498924	1949	3.28981	283	45	1060	350	136	27	470	56	72.8	9.8	5.56	0.72	45.4	6.5	4.26	0.63	22.4	3.9	2.53	0.46	7.1	1.2	0.96	0.23	3.44	0.85	0.42	0.16	4.47	0.37
L21_9	246	31	269	55	390	36	0.689744	-0.161312	2698	3.43104	436	53	1370	220	175	35	717	69	141	15	11.2	1.4	133	16	13.3	1.4	79.2	8	15.7	1.7	44.7	5.7	5.07	0.7	21.6	3.5	2.79	0.4	5.71	0.35
L21_10	191	27	337	66	58	7.8	5.81034	0.764202	4738	3.6756	580	100	3200	1200	208	47	750	120	74.7	6.8	11.6	1.5	48.3	7.3	4.37	0.66	16.6	2.8	2.53	0.4	4	1	0.42	0.16	2.31	0.89	0.22	0.12	7.68	0.59
L21_11	156	26	380	110	177	26	2.14689	0.33181	2578	3.41128	407	73	1350	320	170	35	651	76	108	16	11.3	1.5	89	14	7	1.3	42	6.4	7.1	1.3	18.2	2.9	2.36	0.69	9.6	2	1.62	0.44	6.44	0.5
L21_12	142	20	246	38	87.2	8.9	2.8211	0.450419	1832	3.26293	259	36	920	180	121	21	532	52	89.3	8	8.4	1.2	53.1	5.4	4.95	0.53	24.8	3.9	3.66	0.65	7	1.3	1	0.28	4.3	1.2	0.4	0.17	6.4	0.37
L21_13	211	29	430	140	219	26	1.96347	0.293024	2885	3.46015	422	54	1650	320	133	23	680	110	93.3	9.2	11.9	1.4	75.1	8.7	8.5	1.2	44.1	5.4	8.2	1.1	18.3	2.9	2.38	0.48	11	1.8	1.39	0.32	5.87	0.47
L21_14	191	19	236	32	637	64	0.370487	-0.431227	2053	3.31239	228	33	1030	170	125	17	670	69	147	13	9.79	0.99	146	14	18.9	1.8	123	12	23.3	2	58.3	6.6	5.62	0.74	29.5	3.7	3.44	0.6	4.08	0.24
L21_15	220	22	306	46	362	33	0.845304	-0.0729871	2143	3.33102	283	31	1090	160	127	13	643	61	117	11	11.6	1.1	101	10	11.5	1.2	78.2	8.6	14.7	1.6	33.9	3.6	3.84	0.56	20.5	2.6	2.54	0.39	5.25	0.31
L21_16	217	25	296	45	234	28	1.26496	0.102076	2552	3.40688	356	42	1340	220	157	22	699	75	110.9	9.8	11.6	1.3	91	11	8.5	0.97	48.5	6.1	8.6	1	19.4	2.6	2.47	0.43	10.8	1.9	1.59	0.38	5.99	0.39
L21_17	129	14	310	52	64.5	8.3	4.8062	0.681802	2649	3.42308	471	78	1510	310	129	19	539	68	79.9	9.3	8.6	1	47.8	7.8	4.12	0.63	15.9	2.4	2.67	0.38	4.72	0.87	0.43	0.15	1.11	0.45	0.32	0.13	7.74	0.61
L21_18	199	28	229	43	287	35	0.797909	-0.0980464	3650	3.56229	620	110	2010	380	215	27	805	77	150	15	12.9	1.3	100	11	12.8	1.7	63	7.3	11.6	1.4	25.1	3.4	2.79	0.46	16.5	2.4	2.84	0.51	6.21	0.43
L21_19	202	33	337	59	275	41	1.22545	0.0882972	2650	3.42325	308	43	1390	320	132	17	820	120	159	20	11.9	1.5	119	16	12.2	1.4	74	11	10.6	1.3	27.5	3.8	2.88	0.4	16.3	2.7	2.09	0.43	5.79	0.5
L21_20	229	52	430	130	334	37	1.28743	0.109722	2342	3.36959	250	58	1200	300	166	32	726	97	154	20	11.6	1.5	143	21	17.9	3.1	93	15	13.9	1.7	39.5	6.6	4.3	0.68	20	3.4	2.93	0.53	4.57	0.33
L21_21	201	30	490	110	256	43	1.91406	0.281956	1253	3.09795	145	35	700	170	99	27	309	37	65.2	9	7.14	0.96	59.9	8.3	8.4	1.3	54.2	8.6	8.4	1.2	23.5	3.3	3.05	0.5	15.5	2.7	2.46	0.56	2.72	0.25
L21_22	181	27	349	77	328	54	1.06402	0.0269516	2702	3.43169	338	57	1260	180	184	29	920	120	153	16	16.2	1.6	121	14	13.7	1.9	64.9	7.2	9.8	1.3	22.2	3.4	2.5	0.43	18	3.3	1.82	0.36	6.09	0.47
L21_23	206	24	387	80	141	19	2.74468	0.438492	2133	3.32899	281	48	1270	270	136	35	446	53	75.6	8.6	7.61	0.94	58.3	8	6.02	0.96	35.9	7.5	4.84	0.73	12.6	2.4	1.04	0.23	7.5	1.4	0.88	0.29	5.11	0.48
L21_24	171	21	269	45	226	25	1.19027	0.0756438	1969	3.29425	254	30	1050	210	114	21	551	65	99.3	8.6	9.1	1	75.9	8.7	10.1	1.4	51.6	6.1	9.7	1.2	22.7	3.3	2.32	0.47	12.1	2.1	1.9	0.32	4.68	0.35
L21_25	239	47	314	60	221	40	1.42081	0.152537	2506	3.39898	338	54	1290	270	176	38	702	77	110	14	13.7	1.6	91	14	8.4	1.1	53.7	8.2	8.1	1.3	19.5	3.1	2.07	0.35	15.4	3.5	1.9	0.44	8.16	0.8
L21_26	266	50	450	170	365	61	1.23288	0.0909196	1845	3.266	240	38	960	200	137	27	508	68	90	10	9.6	1.8	92	12	15.2	2.5	75	13	11.9	2	27.8	4.3	3.11	0.54	19.2	4.4	1.57	0.39	4.86	0.43
L21_27	206	38	282	57	211	24	1.33649	0.125967	2586	3.41263	348	63	1280	310	168	40	790	120	144	17	11.1	1.6	95	12	11.6	2.1	47.3	7.2	9.2	1.6	18.6	2.9	2.17	0.52	10.5	2.1	1.28	0.33	4.2	0.38
L21_28	262	48	255	59	350	60	0.728571	-0.137528	2428	3.38525	344	47	1210	290	196	44	678	91	115	13	11.2	1.3	88.2	8.7	11.3	1.3	60.8	8.1	9.8	1.2	25.8	3.8	3.34	0.58	14.8	2.5	1.85	0.45	3.9	0.23
L36_0	880	100	1030	200	1110	140	0.927928	-0.0324858	1072	3.03019	145	21	484	88	70	14	373	48	142	15	20.1	2	184	20	25.7	2.7	185	19	36.9	4.7	101	12	12.6	2	94	11	9.7	1.2	2.17	0.18
L36_1	2070	240	734	92	1860	200	0.394624	-0.403817	1948	3.28959	316	38	840	120	128	18	664	69	245	25	31.2	2.6	314	29	56.9	6.6	337	34	64.9	7.1	159	16	23.8	2.3	152	19	18.1	2.1	1.57	0.12
L36_2	1880	210	900	190	1590	180	0.566038	-0.247155	1880	3.27416	286	47	840	120	119	19	635	75	228	20	36.2	4.2	248	32	44.1	4.7	342	40	53.1	5.5	149	16	21.2	2.3	150	17	19.1	3	1.42	0.11
L36_3	2330	340	840	140	2010	260	0.41791	-0.378917	2204	3.34321	326	47	1040	190	122	17	716	67	291	34	33.5	3.8	284	34	59.4	7.4	364	41	61.5	6.4	175	20	24.5	2.8	169	22	21	2.4	5.07	0.5
L36_4	634	74	890	140	591	70	1.50592	0.177803	972	2.98767	97	17	375	62	70	11	430	51	117.8	9.7	19.5	2.6	106	12	14.8	1.5	94	11	19	2.5	52.2	7.5	6.93	0.86	51.6	6.5	6.11	0.93	2.04	0.15
L36_5	501	52	1100	140	525	68	2.09524	0.321233	251.6	2.40071	29.9	4.8	108	20	18.7	3.7	95	11	34.8	4.1	10.9	1.2	66	10	9.6	1.2	84	11	16.2	1.9	55.3	6.8	7.34	0.98	51.7	6	6.96	0.96	2.71	0.2
L36_6	1280	140	900	150	1590	170	0.566038	-0.247155	1436	3.15715	189	27	637	99	101	18	509	64	205	25	28	3	237	27	39.9	3.9	270	30	51.5	5.2	149	17	18.3	1.7	119	14	15.8	2.1	4.08	0.29
L36_7	1760	180	960	180	1930	200	0.497409	-0.303286	1873	3.27254	250	38	850	130	151	30	622	67	220	20	31	2.9	287	27	48.8	5	349	36	63.2	6	176	14	27.4	3.4	151	16	19.1	2.3	1.93	0.16
L36_8	1590	180	840	140	1610	210	0.521739	-0.282547	1612	3.20737	221	32	740	130	113	19	538	65	200	19	26.3	2.9	229	23	40.2	4.4	293	23	52.4	4.7	143	14	18.2	1.7	130	16	15.8	1.9	0.939	0.068
L36_9	1840	260	950	230	2110	210	0.450237	-0.346559	2134	3.32919	299	51	940	220	157	23	738	77	263	22	35.7	3.4	285	26	54	6.4	370	32	68.3	6.3	173	13	27.5	2.6	164	21	21.1	2.2	1.123	0.094
L36_10	2170	290	760	110	1890	230	0.402116	-0.395648	1985	3.29776	276	32	940	160	131	18	638	72	222	20	34.9	4.3	296	34	47.2	5	340	35	63.3	9.1	178	24	25.5	3.1	132	16	18.5	1.9	1.71	0.25
L36_11	2470	350	910	180	1990	260	0.457286	-0.339812	1717	3.23477	209	23	780	110	122	14	606	61	219	19	31.9	3.1	255	25	52.5	6	350	39	57	5.2	152	13	22.8	2.9	142	13	18.3	2.3	1.41	0.12
L36_12	1670	150	760	130	1990	240	0.38191	-0.418039	1733	3.2388	225	28	730	100	124	20	654	62	212	17	29.5	2.8	288	33	50.3	5.9	366	38	62.4	7.1	167	17	23.7	3.1	151	18	18.1	2	2.03	0.16
L36_13	1800	190	715	86	2000	240	0.3575	-0.446724	1651	3.21775	196	29	820	140	98	15	537	47	189	17	31.1	3.5	267	28	51.3	5.9	351	35	55.5	4.5	162	17	23.3	2.3	139	14	20.3	2.2	10.09	0.65
L36_14	940	100	1490	260	1260	160	1.18254	0.0728157	2240	3.35025	312	55	1030	180	154	29	744	90	175	17	30.2	3.3	193	20	31.2	3	223	23	38.7	4	103.3	9.4	15.2	1.5	108	12	11.9	1.3	0.845	0.056
L36_15	1900	200	870	120	2030	170	0.428571	-0.367977	1880	3.27416	238	33	910	130	117	16	615	62	237	22	34	3.5	336	35	57.3	6.3	423	46	76.3	6	174	13	28	3.5	156	15	20.8	2.4	1.56	0.15
L36_16	1520	150	890	140	2050	210	0.434146	-0.362364	1762	3.24601	225	30	737	93	125	17	675	75	231	20	34.4	3.1	317	35	54.2	5.6	362	34	70.5	6.6	172	19	25.4	3	138	15	20.4	2.5	2.67	0.18
L36_17	1360	150	1040	230	1720	200	0.604651	-0.218495	1422	3.1529	188	28	617	99	96	17	521	61	190	18	27.7	3.5	277	33	45.9	5.4	307	31	52	5.2	141	13	24.7	2.6	146	15	19.6	2	1.122	0.093
L36_18	1470	170	830	130	1560	180	0.532051	-0.274047	1450	3.16137	176	22	659	94	99	17	516	62	154	16	28.7	2.7	218	21	38.1	3.7	246	22	48.5	4.7	132	14	19.7	2.1	130	13	15.7	1.9	1.319	0.098
L36_19	1820	180	870	130	2150	180	0.404651	-0.392919	1992	3.29929	247	30	890	120	133	18	722	61	265	24	34.3	2.7	339	32	57.9	6	388	37	71.9	7.2	182	18	26.1	2.1	175	17	22	2.2	2.07	0.16
L36_20	2350	190	718	93	1750	180	0.410286	-0.386914	2484	3.39515	274	31	1260	350	183	22	767	68	266	20	37.8	3	289	28	47	5.3	305	37	61.3	7.7	149	13	20.4	2.4	126	17	17.2	1.9	12.42	0.8
L36_21	1650	140	850	140	2240	160	0.379464	-0.420829	2495	3.39707	327	45	1110	170	187	28	871	84	303	28	45	4.2	342	29	68.3	6.7	447	41	76	7.8	174	17	32.4	3.8	200	19	26.1	2.6	1.77	0.11
L36_22	1880	140	1010	180	2110	210	0.478673	-0.319961	1745	3.2418	238	23	759	94	107	11	641	60	217	17	32.3	2.7	285	24	54.7	5.6	355	33	68.4	7.2	162	12	24.6	2.4	152	12	21.4	1.8	1.155	0.083
L36_23	1730	190	990	190	2100	210	0.471429	-0.326584	1730	3.23805	207	21	741	90	130	17	652	65	211	18	32.3	3.3	304	25	52.7	4.7	344	28	56.8	4.2	174	19	24.8	2.4	143	13	20.8	2.1	1.67	0.1
L36_24	1050	130	1160	290	1360	130	0.852941	-0.0690809	1196	3.07773	135	19	537	86	88	13	436	50	142	13	25.1	3.2	236	28	36.3	4.3	244	28	49	5.9	115	12	16.7	1.7	103	10	12.6	1.5	2.08	0.14
L36_25	973	89	900	110	1520	130	0.592105	-0.227601	736.3	2.86705	91	13	298	48	48.3	8.3	299	32	112.4	9.4	23.2	2.1	209	22	35.9	3.3	267	25	51.2	5.3	137	14	19.2	1.9	114	11	14.9	1.6	4.31	0.3
L36_26	1740	140	856	97	2230	210	0.383857	-0.415831	1785	3.25164	230	24	763	86	138	16	654	56	248	23	30.4	2.9	317	23	55.5	4.2	376	35	72.1	6.2	180	16	26.2	2.6	170	17	20.1	1.9	1.5	0.11
